# Supplementary material
Source: HighWire-hosted journal article supplement (https://drc.bmj.com/content/9/1/e002162)
Supplement: inline-supplementary-material-2 [file inline-supplementary-material-2.pdf]

Supplementary file 2: support needs of people living with diabetes during COVID-19

### **Supplementary File 2**

**Title: Addressing support needs of people living with diabetes during the coronavirus COVID-19 pandemic: insights from a UK survey.**

Sarah Sauchelli\*<sup>1</sup>, Julia Bradley<sup>1</sup>, Clare England<sup>1</sup>, Aidan Searle<sup>1</sup>, Alex Whitmarsh<sup>1</sup>

<sup>1</sup> *National Institute for Health Research Bristol Biomedical Research Centre, University Hospitals of Bristol and Weston NHS Foundation Trust and University of Bristol.*

### **Responses to the survey**

#### **1. Responses from people living with diabetes**

##### *1.1. Geographical distribution of responses*

| <b>Region/Nation</b> | <b>n</b>   | <b>%</b> |
|----------------------|------------|----------|
| Scotland             | 89         | 11.6     |
| Wales                | 32         | 4.18     |
| East Midlands        | 31         | 4.05     |
| East of England      | 52         | 6.8      |
| Greater London       | 65         | 8.5      |
| North East           | 14         | 1.83     |
| North West           | 55         | 7.19     |
| Northern Ireland     | 14         | 1.83     |
| South East           | 193        | 25.2     |
| South West           | 142        | 18.6     |
| West Midlands        | 57         | 7.45     |
| Yorkshire & Humber   | 21         | 2.75     |
| <b>Total</b>         | <b>765</b> |          |

##### *1.2. Demographic characteristics.*

| <b>Diabetes group</b>    | <b>n</b> | <b>%</b> |
|--------------------------|----------|----------|
| Type 1 diabetes          | 535      | 69.2     |
| Type 2 diabetes          | 220      | 28.5     |
| Another type of diabetes | 18       | 2.3      |
|                          | 773      | 100.0    |

## Supplementary file 2: support needs of people living with diabetes during COVID-19

|                                   | All<br>(n=773) | Type 1<br>(n=535) | Type 2<br>(n=220) |
|-----------------------------------|----------------|-------------------|-------------------|
| <b>Gender, n (%)</b>              |                |                   |                   |
| Female                            | 516 (67.1%)    | 365 (68.6%)       | 139 (63.5%)       |
| Male                              | 249 (32.4%)    | 165 (31.0%)       | 78 (35.6%)        |
| Other                             | 4 (0.5%)       | 2 (0.4%)          | 2 (0.9%)          |
| <b>Age, mean (SD)</b>             | 47.9 (14.5)    | 44.4 (14.2)       | 56.5 (11.4)       |
| <b>Ethnicity, n (%)</b>           |                |                   |                   |
| Arab                              | 1 (0.1%)       | 1 (0.2%)          | 0 (0.0%)          |
| Asian or Asian British: Chinese   | 3 (0.4%)       | 0 (0.0%)          | 3 (1.4%)          |
| Asian or Asian British: Indian    | 8 (1.0%)       | 2 (0.4%)          | 6 (2.7%)          |
| Asian or Asian British: Pakistani | 1 (0.1%)       | 1 (0.2%)          | 0 (0.0%)          |
| Black or Black British: Caribbean | 4 (0.5%)       | 0 (0.0%)          | 4 (1.8%)          |
| Mixed: White and Asian            | 5 (0.7%)       | 3 (0.6%)          | 2 (0.9%)          |
| Mixed: White and Black African    | 1 (0.1%)       | 1 (0.2%)          | 0 (0.0%)          |
| Mixed: White and Black Caribbean  | 1 (0.1%)       | 1 (0.2%)          | 0 (0.0%)          |
| Other ethnic group                | 1 (0.1%)       | 0 (0.0%)          | 1 (0.5%)          |
| Other Mixed background            | 1 (0.1%)       | 1 (0.2%)          | 0 (0.0%)          |
| Other White background            | 31 (4.0%)      | 26 (4.9%)         | 5 (2.3%)          |
| Prefer not to answer              | 3 (0.4%)       | 2 (0.4%)          | 1 (0.5%)          |
| White: British                    | 693 (90.1%)    | 485 (91.2%)       | 192 (87.7%)       |
| White: Irish                      | 16 (2.1%)      | 9 (1.7%)          | 5 (2.3%)          |

**Living circumstances**

| Are you currently living alone? | All          | Type 1       | Type 2       |
|---------------------------------|--------------|--------------|--------------|
| No                              | 649 (84.1%)  | 458 (85.6%)  | 176 (80.4%)  |
| Yes                             | 123 (15.9%)  | 77 (14.4%)   | 43 (19.6%)   |
|                                 | 772 (100.0%) | 535 (100.0%) | 219 (100.0%) |

| Has the number of people you are living with changed as a result of the coronavirus pandemic? | All          | Type 1       | Type 2       |
|-----------------------------------------------------------------------------------------------|--------------|--------------|--------------|
| No                                                                                            | 684 (88.9%)  | 467 (87.6%)  | 200 (91.7%)  |
| Yes                                                                                           | 85 (11.1%)   | 66 (12.4%)   | 18 (8.3%)    |
|                                                                                               | 769 (100.0%) | 533 (100.0%) | 218 (100.0%) |

## Supplementary file 2: support needs of people living with diabetes during COVID-19

**Circumstances in relation to COVID-19**

| Have you been diagnosed with or displayed symptoms of coronavirus since the beginning of February? | All          | Type 1       | Type 2       |
|----------------------------------------------------------------------------------------------------|--------------|--------------|--------------|
| No                                                                                                 | 623 (81.0%)  | 434 (81.8%)  | 176 (80.0%)  |
| Yes                                                                                                | 70 (9.1%)    | 47 (8.9%)    | 21 (9.5%)    |
| Diagnosed with coronavirus                                                                         | 2 (0.3%)     | 2 (0.4%)     | 0 (0.0%)     |
| Not sure                                                                                           | 74 (9.6%)    | 48 (9.0%)    | 23 (10.5%)   |
|                                                                                                    | 769 (100.0%) | 531 (100.0%) | 220 (100.0%) |

| Which of the following best describes your current circumstances? | All          | Type 1       | Type 2       |
|-------------------------------------------------------------------|--------------|--------------|--------------|
| Following stringent Physical/social/physical distancing           | 513 (66.8%)  | 355 (66.9%)  | 147 (67.1%)  |
| Self-isolating at home                                            | 16 (2.1%)    | 9 (1.7%)     | 7 (3.3%)     |
| Shielding group                                                   | 59 (7.7%)    | 37 (7.0%)    | 19 (8.7%)    |
| Shielding (but not in shielding group)                            | 75 (9.8%)    | 49 (9.2%)    | 22 (10.0%)   |
| Key worker/still leaving home to work                             | 97 (12.6%)   | 75 (14.1%)   | 22 (10.1%)   |
| Other                                                             | 4 (5.7%)     | 3 (0.6%)     | 1 (0.5%)     |
| Don't know                                                        | 4 (0.5%)     | 3 (0.6%)     | 1 (0.5%)     |
|                                                                   | 768 (100.0%) | 531 (100.0%) | 219 (100.0%) |

*1.3. Confidence in diabetes self-management*

| BEFORE the coronavirus pandemic and social/physical distancing guidance I was confident that I was able to... | All |              | Type 1 |              | Type 2 |              |
|---------------------------------------------------------------------------------------------------------------|-----|--------------|--------|--------------|--------|--------------|
|                                                                                                               | n   | Median (IQR) | n      | Median (IQR) | n      | Median (IQR) |
| Check blood glucose                                                                                           | 720 | 10 (10, 10)  | 528    | 10 (10, 10)  | 174    | 10 (9, 10)   |
| Correct high blood glucose                                                                                    | 703 | 10 (8, 10)   | 530    | 10 (9, 10)   | 156    | 7 (3, 10)    |
| Correct low blood glucose                                                                                     | 680 | 10 (9, 10)   | 526    | 10 (10, 10)  | 136    | 10 (7, 10)   |
| Good blood glucose regulation                                                                                 | 571 | 9 (7, 10)    | 363    | 10 (8, 10)   | 197    | 8 (5, 10)    |
| Choose correct foods                                                                                          | 729 | 10 (8, 10)   | 519    | 10 (9, 10)   | 192    | 8 (5, 10)    |
| Keep healthy weight                                                                                           | 755 | 7 (4, 10)    | 525    | 8 (5, 10)    | 212    | 5 (2, 8)     |
| Examine feet                                                                                                  | 769 | 10 (8, 10)   | 533    | 10 (8, 10)   | 218    | 10 (7, 10)   |
| Healthy eating pattern                                                                                        | 770 | 8 (6, 10)    | 534    | 9 (7, 10)    | 218    | 7 (5, 9)     |
| Physical activity                                                                                             | 770 | 8 (5, 10)    | 534    | 8 (6, 10)    | 218    | 6 (4, 9)     |
| Mental wellbeing                                                                                              | 770 | 8 (5, 10)    | 534    | 8 (6, 10)    | 218    | 7 (5, 10)    |

Note: score given on a Likert scale ranging from 0 (Could not do at all) to 10 (Certain could do). Not applicable was also an option to account inter-individual variability in condition and self-management requirements.

| AT PRESENT, I am confident that... | All |              | Type 1 |              | Type 2 |              |
|------------------------------------|-----|--------------|--------|--------------|--------|--------------|
|                                    | n   | Median (IQR) | N      | Median (IQR) | n      | Median (IQR) |
| Check blood glucose                | 727 | 10 (10, 10)  | 530    | 10 (10, 10)  | 179    | 10 (9, 10)   |
| Correct high blood glucose         | 718 | 10 (8, 10)   | 531    | 10 (9, 10)   | 170    | 7 (4, 10)    |
| Correct low blood glucose          | 697 | 10 (9, 10)   | 526    | 10 (9, 10)   | 153    | 9 (6, 10)    |
| Good blood glucose                 | 578 | 9 (7, 10)    | 367    | 10 (8, 10)   | 200    | 8 (5, 10)    |

## Supplementary file 2: support needs of people living with diabetes during COVID-19

|                        |     |            |     |            |     |            |
|------------------------|-----|------------|-----|------------|-----|------------|
| regulation             |     |            |     |            |     |            |
| Choose correct foods   | 744 | 9 (7, 10)  | 524 | 10 (8, 10) | 202 | 8 (5, 10)  |
| Keep healthy weight    | 759 | 7 (4, 9)   | 524 | 7 (5, 10)  | 217 | 5 (2, 7)   |
| Examine feet           | 764 | 10 (8, 10) | 527 | 10 (8, 10) | 219 | 10 (7, 10) |
| Healthy eating pattern | 766 | 8 (6, 10)  | 530 | 8 (6, 10)  | 218 | 7 (5, 9)   |
| Physical activity      | 768 | 7 (5, 10)  | 531 | 8 (5, 10)  | 219 | 6 (4, 8)   |
| Mental wellbeing       | 765 | 7 (5, 9)   | 530 | 7 (5, 9)   | 217 | 7 (4, 9)   |

Note: score given on a Likert scale ranging from 0 (Could not do at all) to 10 (Certain could do). Not applicable was also an option to account inter-individual variability in condition and self-management requirements.

| Change in score                      | All         | Type 1      | Type 2      |
|--------------------------------------|-------------|-------------|-------------|
| <b>Check blood glucose</b>           |             |             |             |
| Decreased                            | 68 (9.6%)   | 45 (8.6%)   | 23 (13.5%)  |
| Same                                 | 600 (84.3%) | 453 (86.5%) | 129 (75.9%) |
| Increased                            | 44 (6.2%)   | 26 (5.0%)   | 18 (10.6%)  |
| <b>Correct high blood glucose</b>    |             |             |             |
| Decreased                            | 95 (13.6%)  | 67 (12.7%)  | 25 (16.2%)  |
| Same                                 | 510 (73.1%) | 410 (77.8%) | 88 (57.1%)  |
| Increased                            | 93 (13.3%)  | 50 (9.5%)   | 41 (26.6%)  |
| <b>Correct low blood glucose</b>     |             |             |             |
| Decreased                            | 92 (13.7%)  | 71 (13.7%)  | 20 (14.8%)  |
| Same                                 | 522 (77.7%) | 412 (79.4%) | 93 (68.9%)  |
| Increased                            | 58 (8.6%)   | 36 (6.9%)   | 22 (16.3%)  |
| <b>Good blood glucose regulation</b> |             |             |             |
| Decreased                            | 92 (16.6%)  | 48 (13.5%)  | 42 (22.1%)  |
| Same                                 | 380 (68.5%) | 262 (73.8%) | 111 (58.4%) |
| Increased                            | 83 (15.0%)  | 45 (12.7%)  | 37 (19.5%)  |
| <b>Choose correct foods</b>          |             |             |             |
| Decreased                            | 173 (24.1%) | 107 (20.8%) | 60 (32.1%)  |
| Same                                 | 440 (61.2%) | 345 (67.1%) | 87 (46.5%)  |
| Increased                            | 106 (14.7%) | 62 (12.1%)  | 40 (21.4%)  |
| <b>Keep healthy weight</b>           |             |             |             |
| Decreased                            | 202 (27.1%) | 144 (27.9%) | 53 (25.2%)  |
| Same                                 | 386 (51.8%) | 284 (54.9%) | 93 (44.3%)  |
| Increased                            | 157 (21.1%) | 89 (17.2%)  | 64 (30.5%)  |
| <b>Examine feet</b>                  |             |             |             |
| Decreased                            | 87 (11.4%)  | 58 (11.0%)  | 27 (12.4%)  |
| Same                                 | 598 (78.7%) | 419 (79.8%) | 163 (75.1%) |
| Increased                            | 75 (9.9%)   | 48 (9.1%)   | 27 (12.4%)  |
| <b>Healthy eating pattern</b>        |             |             |             |
| Decreased                            | 226 (29.6%) | 153 (28.9%) | 69 (31.9%)  |
| Same                                 | 393 (51.5%) | 287 (54.3%) | 93 (43.1%)  |
| Increased                            | 144 (18.9%) | 89 (16.8%)  | 54 (25.0%)  |
| <b>Physical activity</b>             |             |             |             |
| Decreased                            | 245 (32.0%) | 166 (31.3%) | 71 (32.7%)  |
| Same                                 | 361 (47.2%) | 257 (48.5%) | 96 (44.2%)  |
| Increased                            | 159 (20.8%) | 107 (20.2%) | 50 (23.0%)  |
| <b>Mental wellbeing</b>              |             |             |             |

## Supplementary file 2: support needs of people living with diabetes during COVID-19

|           |             |             |             |
|-----------|-------------|-------------|-------------|
| Decreased | 282 (37.0%) | 207 (39.1%) | 66 (30.7%)  |
| Same      | 362 (47.5%) | 244 (46.1%) | 110 (51.2%) |
| Increased | 118 (15.5%) | 78 (14.7%)  | 39 (18.1%)  |

**Difference between respondents living alone and those living with others**

| <b>Change in score</b>               | <b>Not living alone</b> | <b>Living alone</b> |
|--------------------------------------|-------------------------|---------------------|
| <b>Check blood glucose</b>           |                         |                     |
| Decreased                            | 55 (9.0%)               | 13 (12.6%)          |
| Same                                 | 516 (84.9%)             | 84 (81.6%)          |
| Increased                            | 37 (6.1%)               | 6 (5.8%)            |
| <b>Correct high blood glucose</b>    |                         |                     |
| Decreased                            | 71 (11.9%)              | 24 (23.3%)          |
| Same                                 | 445 (74.8%)             | 65 (63.1%)          |
| Increased                            | 79 (13.3%)              | 14 (13.6%)          |
| <b>Correct low blood glucose</b>     |                         |                     |
| Decreased                            | 70 (12.3%)              | 22 (21.8%)          |
| Same                                 | 451 (79.0%)             | 71 (70.3%)          |
| Increased                            | 50 (8.8%)               | 8 (7.9%)            |
| <b>Good blood glucose regulation</b> |                         |                     |
| Decreased                            | 74 (15.6%)              | 18 (22.0%)          |
| Same                                 | 327 (69.1%)             | 53 (64.6%)          |
| Increased                            | 72 (15.2%)              | 11 (13.4%)          |
| <b>Choose correct foods</b>          |                         |                     |
| Decreased                            | 150 (24.6%)             | 23 (20.9%)          |
| Same                                 | 373 (61.2%)             | 67 (60.9%)          |
| Increased                            | 86 (14.1%)              | 20 (18.2%)          |
| <b>Keep healthy weight</b>           |                         |                     |
| Decreased                            | 166 (26.3%)             | 36 (31.6%)          |
| Same                                 | 329 (52.2%)             | 57 (50.0%)          |
| Increased                            | 135 (21.4%)             | 21 (18.4%)          |
| <b>Examine feet</b>                  |                         |                     |
| Decreased                            | 68 (10.6%)              | 19 (16.1%)          |
| Same                                 | 508 (79.3%)             | 90 (76.3%)          |
| Increased                            | 65 (10.1%)              | 9 (7.6%)            |
| <b>Healthy eating pattern</b>        |                         |                     |
| Decreased                            | 185 (28.7%)             | 41 (35.0%)          |
| Same                                 | 335 (51.9%)             | 57 (48.7%)          |
| Increased                            | 125 (19.4%)             | 19 (16.2%)          |
| <b>Physical activity</b>             |                         |                     |
| Decreased                            | 190 (29.5%)             | 55 (46.2%)          |
| Same                                 | 309 (47.9%)             | 51 (42.9%)          |
| Increased                            | 146 (22.6%)             | 13 (10.9%)          |
| <b>Mental wellbeing</b>              |                         |                     |
| Decreased                            | 235 (36.6%)             | 47 (39.5%)          |
| Same                                 | 301 (46.9%)             | 60 (50.4%)          |
| Increased                            | 106 (16.5%)             | 12 (10.1%)          |

## Supplementary file 2: support needs of people living with diabetes during COVID-19

**Differences between individuals living alone that were not receiving outside support and those that were.**

| Change in score                      | Not receiving outside support | Receiving outside support |
|--------------------------------------|-------------------------------|---------------------------|
| <b>Check blood glucose</b>           |                               |                           |
| Decreased                            | 7 (17%)                       | 5 (9%)                    |
| Same                                 | 30 (73%)                      | 51 (89%)                  |
| Increased                            | 4 (10%)                       | 1 (2%)                    |
| <b>Correct high blood glucose</b>    |                               |                           |
| Decreased                            | 10 (25%)                      | 14 (24%)                  |
| Same                                 | 23 (57%)                      | 39 (66%)                  |
| Increased                            | 7 (18%)                       | 6 (10%)                   |
| <b>Correct low blood glucose</b>     |                               |                           |
| Decreased                            | 6 (16%)                       | 15 (26%)                  |
| Same                                 | 30 (79%)                      | 38 (66%)                  |
| Increased                            | 2 (5%)                        | 5 (9%)                    |
| <b>Good blood glucose regulation</b> |                               |                           |
| Decreased                            | 7 (22%)                       | 10 (22%)                  |
| Same                                 | 19 (59%)                      | 33 (72%)                  |
| Increased                            | 6 (19%)                       | 3 (7%)                    |
| <b>Choose correct foods</b>          |                               |                           |
| Decreased                            | 8 (19%)                       | 15 (24%)                  |
| Same                                 | 24 (56%)                      | 40 (63%)                  |
| Increased                            | 11 (26%)                      | 8 (13%)                   |
| <b>Keep healthy weight</b>           |                               |                           |
| Decreased                            | 10 (23%)                      | 24 (37%)                  |
| Same                                 | 21 (49%)                      | 33 (51%)                  |
| Increased                            | 12 (28%)                      | 8 (12%)                   |
| <b>Examine feet</b>                  |                               |                           |
| Decreased                            | 5 (11%)                       | 13 (19%)                  |
| Same                                 | 33 (75%)                      | 52 (78%)                  |
| Increased                            | 6 (14%)                       | 2 (3%)                    |
| <b>Healthy eating pattern</b>        |                               |                           |
| Decreased                            | 15 (34%)                      | 23 (35%)                  |
| Same                                 | 21 (48%)                      | 32 (48%)                  |
| Increased                            | 8 (18%)                       | 11 (17%)                  |
| <b>Physical activity</b>             |                               |                           |
| Decreased                            | 18 (40%)                      | 34 (51%)                  |
| Same                                 | 23 (51%)                      | 24 (36%)                  |
| Increased                            | 4 (9%)                        | 9 (13%)                   |
| <b>Mental wellbeing</b>              |                               |                           |
| Decreased                            | 18 (40%)                      | 27 (40%)                  |
| Same                                 | 25 (56%)                      | 31 (46%)                  |
| Increased                            | 2 (4%)                        | 9 (13%)                   |

Note: This table is restricted to participants who reported living alone for the question on living circumstances.

Qualitative responses regarding what respondents perceive they need to improve their diabetes self-management are summarised in the main manuscript.

## Supplementary file 2: support needs of people living with diabetes during COVID-19

## 1.4. Cancellation of clinical appointments

| Have you had to cancel diabetes appointments and check-ups because of the pandemic? | All          | Type 1       | Type 2       |
|-------------------------------------------------------------------------------------|--------------|--------------|--------------|
| No                                                                                  | 372 (48.2%)  | 249 (46.7%)  | 118 (53.6%)  |
| Yes                                                                                 | 399 (51.8%)  | 284 (53.3%)  | 102 (46.4%)  |
|                                                                                     | 771 (100.0%) | 533 (100.0%) | 220 (100.0%) |

Qualitative responses regarding the impact of the cancellation of appointments are summarised in the appendices.

## 1.5. Sources used for information, advice and support

| Which of these resources have you used for guidance on how you should behave regarding social/physical distancing measures? (Tick all that apply) | All (n = 770) | %    | Type 1 (n = 535) | %    | Type 2 (n = 217) | %    |
|---------------------------------------------------------------------------------------------------------------------------------------------------|---------------|------|------------------|------|------------------|------|
| News channels                                                                                                                                     | 557           | 72.3 | 384              | 71.8 | 158              | 72.8 |
| Public Health and government website                                                                                                              | 386           | 50.1 | 286              | 53.5 | 91               | 41.9 |
| Diabetes UK website                                                                                                                               | 461           | 59.9 | 340              | 63.6 | 110              | 50.7 |
| NHS website                                                                                                                                       | 386           | 50.1 | 282              | 52.7 | 100              | 46.1 |
| Other website                                                                                                                                     | 52            | 6.8  | 36               | 6.7  | 12               | 5.5  |
| Social media                                                                                                                                      | 219           | 28.4 | 156              | 29.2 | 56               | 25.8 |
| GP, diabetes nurse, healthcare professional                                                                                                       | 261           | 33.9 | 185              | 34.6 | 68               | 31.3 |
| Family                                                                                                                                            | 174           | 22.6 | 125              | 23.4 | 41               | 18.9 |
| Friends                                                                                                                                           | 111           | 14.4 | 79               | 14.8 | 28               | 12.9 |
| Employer                                                                                                                                          | 113           | 14.7 | 85               | 15.9 | 23               | 10.6 |
| Diabetes support group                                                                                                                            | 67            | 8.7  | 52               | 9.7  | 11               | 5.1  |
| Other                                                                                                                                             | 12            | 1.6  | 7                | 1.3  | 4                | 1.8  |

| Which one have you used the most? (Tick one) | All | %    | Type 1 | %    | Type 2 | %    |
|----------------------------------------------|-----|------|--------|------|--------|------|
| News channels                                | 352 | 46.1 | 229    | 43.2 | 114    | 52.8 |
| Public Health and government website         | 96  | 12.6 | 66     | 12.5 | 30     | 13.9 |
| Diabetes UK website                          | 113 | 14.8 | 83     | 15.7 | 28     | 13.0 |
| NHS website                                  | 51  | 6.7  | 35     | 6.6  | 15     | 6.9  |
| Other website                                | 11  | 1.4  | 7      | 1.3  | 3      | 1.4  |
| Social media                                 | 30  | 3.9  | 26     | 4.9  | 3      | 1.4  |
| Facebook                                     | 31  | 4.1  | 24     | 4.5  | 7      | 3.2  |
| GP, diabetes nurse, healthcare professional  | 33  | 4.3  | 22     | 4.2  | 8      | 3.7  |
| Family                                       | 22  | 2.9  | 17     | 3.2  | 4      | 1.9  |
| Friends                                      | 3   | 0.4  | 2      | 0.4  | 1      | 0.5  |
| Employer                                     | 13  | 1.7  | 11     | 2.1  | 2      | 0.9  |
| Diabetes support group                       | 3   | 0.4  | 3      | 0.6  | 0      | 0.0  |
| Other                                        | 5   | 0.7  | 4      | 0.8  | 1      | 0.5  |
| Not applicable                               | 1   | 0.1  | 1      | 0.2  | 0      | 0.0  |

| Which of these resources have you been using for guidance on general diabetes self-management since the start of the | All (n = 713) | % | Type 1 (n = 487) | % | Type 2 (n = 208) | % |
|----------------------------------------------------------------------------------------------------------------------|---------------|---|------------------|---|------------------|---|
|----------------------------------------------------------------------------------------------------------------------|---------------|---|------------------|---|------------------|---|

## Supplementary file 2: support needs of people living with diabetes during COVID-19

| <b>pandemic? (Tick all that apply)</b>      |     |      |     |      |    |      |
|---------------------------------------------|-----|------|-----|------|----|------|
| News channels                               | 101 | 14.2 | 64  | 13.1 | 34 | 16.4 |
| Public Health and government website        | 76  | 10.7 | 48  | 9.9  | 24 | 11.5 |
| Diabetes UK website                         | 347 | 48.7 | 240 | 49.3 | 99 | 47.6 |
| NHS website                                 | 153 | 21.5 | 99  | 20.3 | 53 | 25.5 |
| Other website                               | 28  | 3.9  | 19  | 3.9  | 8  | 3.9  |
| Twitter                                     | 37  | 5.2  | 33  | 6.8  | 3  | 1.4  |
| Facebook                                    | 63  | 8.8  | 46  | 9.5  | 17 | 8.2  |
| GP, diabetes nurse, healthcare professional | 207 | 29.0 | 148 | 30.4 | 51 | 24.5 |
| Family                                      | 57  | 8.0  | 42  | 8.6  | 14 | 6.7  |
| Friends                                     | 26  | 3.7  | 20  | 4.1  | 6  | 2.9  |
| Employer                                    | 9   | 1.3  | 6   | 1.2  | 3  | 1.4  |
| Diabetes support group                      | 48  | 6.7  | 43  | 8.8  | 4  | 1.9  |
| Other                                       | 15  | 2.1  | 9   | 1.9  | 6  | 2.9  |

| <b>Which of these resources do you use to obtain emotional support? (Tick all that apply)</b> | <b>All (n = 687)</b> | <b>%</b> | <b>Type 1 (n = 474)</b> | <b>%</b> | <b>Type 2 (n = 196)</b> | <b>%</b> |
|-----------------------------------------------------------------------------------------------|----------------------|----------|-------------------------|----------|-------------------------|----------|
| Diabetes UK website – online forum                                                            | 55                   | 8.0      | 31                      | 6.5      | 23                      | 11.7     |
| Diabetes UK helpline                                                                          | 15                   | 2.2      | 7                       | 1.5      | 7                       | 3.6      |
| Social media communities                                                                      | 71                   | 10.3     | 54                      | 11.4     | 16                      | 8.2      |
| GP, diabetes nurse, healthcare professional                                                   | 86                   | 12.5     | 61                      | 12.9     | 23                      | 11.7     |
| Family                                                                                        | 473                  | 68.9     | 326                     | 68.8     | 134                     | 68.4     |
| Friends                                                                                       | 350                  | 51.0     | 256                     | 54.0     | 86                      | 43.9     |
| Employer                                                                                      | 39                   | 5.7      | 23                      | 4.9      | 16                      | 8.2      |
| Diabetes support group                                                                        | 32                   | 4.7      | 28                      | 5.9      | 3                       | 1.5      |
| Other                                                                                         | 10                   | 1.5      | 8                       | 1.7      | 2                       | 1.0      |

| <b>Which means do you use to obtain advice/guidance/support from outside your household? (tick all that apply)</b> | <b>All (n = 638*)</b> | <b>Type 1 (n = 442)</b> | <b>Type 2 (n = 179)</b> |
|--------------------------------------------------------------------------------------------------------------------|-----------------------|-------------------------|-------------------------|
| Telephone                                                                                                          | 124 (19.4%)           | 80 (18.1%)              | 43 (24.0%)              |
| Computer                                                                                                           | 467 (73.2%)           | 319 (72.2%)             | 133 (74.3%)             |
| Mobile phone                                                                                                       | 429 (67.2%)           | 315 (71.3%)             | 102 (57.0%)             |
| Someone in the house                                                                                               | 41 (6.4%)             | 25 (5.7%)               | 15 (8.4%)               |
| Other                                                                                                              | 3 (0.5%)              | 2 (0.5%)                | 1 (0.6%)                |

\*113 people said not applicable

### Questions specific to those respondents living alone

| <b>If you are living alone, are you receiving support from people outside your household?</b> | <b>All*</b>  | <b>Type 1</b> | <b>Type 2</b> |
|-----------------------------------------------------------------------------------------------|--------------|---------------|---------------|
| No                                                                                            | 83 (50.6%)   | 51 (47.2%)    | 30 (58.8%)    |
| Yes                                                                                           | 81 (49.4%)   | 57 (52.8%)    | 21 (41.2%)    |
|                                                                                               | 164 (100.0%) | 108 (100.0%)  | 51 (100.0%)   |

\*588 people said NA

This table is restricted to participants who reported living alone for the question on living circumstances.

| <b>If yes, who from?</b> | <b>All</b> |
|--------------------------|------------|
|                          |            |



## Supplementary file 2: support needs of people living with diabetes during COVID-19

|            | (n = 81)   |
|------------|------------|
| Family     | 55 (67.9%) |
| Friends    | 54 (66.7%) |
| Neighbours | 22 (27.2%) |
| Other      | 4 (4.9%)   |

**Opinions on information, advice, and support received**

| In general, how difficult or easy has it been for you to obtain INFORMATION/ADVICE applicable to you on the following? | All         | Type 1      | Type 2     |
|------------------------------------------------------------------------------------------------------------------------|-------------|-------------|------------|
| <b>Glucose control</b>                                                                                                 |             |             |            |
| Very difficult                                                                                                         | 34 (5.5%)   | 15 (3.5%)   | 17 (10.2%) |
| Difficult                                                                                                              | 89 (14.4%)  | 52 (12.0%)  | 34 (20.4%) |
| Moderate                                                                                                               | 168 (27.3%) | 123 (28.3%) | 41 (24.6%) |
| Easy                                                                                                                   | 164 (26.6%) | 125 (28.8%) | 34 (20.4%) |
| Very easy                                                                                                              | 161 (26.1%) | 119 (27.4%) | 41 (24.6%) |
| <b>Diet</b>                                                                                                            |             |             |            |
| Very difficult                                                                                                         | 39 (6.2%)   | 18 (4.3%)   | 21 (10.7%) |
| Difficult                                                                                                              | 80 (12.8%)  | 46 (11.0%)  | 32 (16.3%) |
| Moderate                                                                                                               | 174 (27.8%) | 121 (29.0%) | 51 (26.0%) |
| Easy                                                                                                                   | 173 (27.6%) | 120 (28.8%) | 45 (23.0%) |
| Very easy                                                                                                              | 160 (25.6%) | 112 (26.9%) | 47 (24.0%) |
| <b>Physical activity</b>                                                                                               |             |             |            |
| Very difficult                                                                                                         | 47 (7.3%)   | 28 (6.4%)   | 19 (9.8%)  |
| Difficult                                                                                                              | 85 (13.2%)  | 55 (12.6%)  | 27 (13.9%) |
| Moderate                                                                                                               | 163 (25.3%) | 109 (25.1%) | 50 (25.8%) |
| Easy                                                                                                                   | 199 (30.9%) | 133 (30.6%) | 60 (30.9%) |
| Very easy                                                                                                              | 149 (23.2%) | 110 (25.3%) | 38 (19.6%) |
| <b>Medication</b>                                                                                                      |             |             |            |
| Very difficult                                                                                                         | 34 (5.2%)   | 21 (4.7%)   | 11 (5.8%)  |
| Difficult                                                                                                              | 94 (14.4%)  | 57 (12.8%)  | 35 (18.3%) |
| Moderate                                                                                                               | 165 (25.3%) | 110 (24.6%) | 50 (26.2%) |
| Easy                                                                                                                   | 193 (29.6%) | 139 (31.1%) | 51 (26.7%) |
| Very easy                                                                                                              | 167 (25.6%) | 120 (26.8%) | 44 (23.0%) |
| <b>Emotional wellbeing</b>                                                                                             |             |             |            |
| Very difficult                                                                                                         | 84 (13.3%)  | 58 (13.5%)  | 25 (13.3%) |
| Difficult                                                                                                              | 132 (20.9%) | 89 (20.7%)  | 40 (21.3%) |
| Moderate                                                                                                               | 197 (31.2%) | 136 (31.7%) | 58 (30.9%) |
| Easy                                                                                                                   | 122 (19.3%) | 79 (18.4%)  | 37 (19.7%) |
| Very easy                                                                                                              | 96 (15.2%)  | 67 (15.6%)  | 28 (14.9%) |
| <b>Diabetes management (if showing symptoms)</b>                                                                       |             |             |            |
| Very difficult                                                                                                         | 59 (15.7%)  | 40 (14.5%)  | 19 (20.2%) |
| Difficult                                                                                                              | 70 (18.7%)  | 47 (17.1%)  | 21 (22.3%) |
| Moderate                                                                                                               | 103 (27.5%) | 77 (28.0%)  | 26 (27.7%) |
| Easy                                                                                                                   | 79 (21.1%)  | 62 (22.5%)  | 15 (16.0%) |
| Very easy                                                                                                              | 64 (17.1%)  | 49 (17.8%)  | 13 (13.8%) |
| <b>Physical/social/physical distancing</b>                                                                             |             |             |            |
| Very difficult                                                                                                         | 62 (8.7%)   | 48 (9.7%)   | 13 (6.5%)  |
| Difficult                                                                                                              | 104 (14.5%) | 81 (16.3%)  | 20 (10.0%) |

## Supplementary file 2: support needs of people living with diabetes during COVID-19

|           |             |             |            |
|-----------|-------------|-------------|------------|
| Moderate  | 169 (23.6%) | 117 (23.5%) | 48 (23.9%) |
| Easy      | 191 (26.7%) | 126 (25.4%) | 59 (29.4%) |
| Very easy | 190 (26.5%) | 125 (25.2%) | 61 (30.3%) |

| In general, how difficult or easy has it been for you to obtain SUPPORT applicable to you on the following? | All         | Type 1        | Type 2        |
|-------------------------------------------------------------------------------------------------------------|-------------|---------------|---------------|
| <b>Glucose control</b>                                                                                      |             |               |               |
| Very difficult                                                                                              | 63 (12.0%)  | 37 (10.1%)    | 23 (15.8%)    |
| Difficult                                                                                                   | 111 (21.1%) | 69 (18.8%)    | 39 (26.7%)    |
| Moderate                                                                                                    | 141 (26.8%) | 102 (27.7%)   | 36 (24.7%)    |
| Easy                                                                                                        | 113 (21.4%) | 86 (23.4%)    | 25 (17.1%)    |
| Very easy                                                                                                   | 99 (18.8%)  | 74 (20.1%)    | 23 (15.8%)    |
| <b>Diet</b>                                                                                                 |             |               |               |
| Very difficult                                                                                              | 57 (10.9%)  | 32 (9.3%)     | 24 (14.1%)    |
| Difficult                                                                                                   | 109 (20.8%) | 67 (19.5%)    | 40 (23.5%)    |
| Moderate                                                                                                    | 144 (27.5%) | 98 (28.6%)    | 42 (24.7%)    |
| Easy                                                                                                        | 122 (23.3%) | 80 (23.3%)    | 40 (23.5%)    |
| Very easy                                                                                                   | 91 (17.4%)  | 66 (19.2%)    | 24 (14.1%)    |
| <b>Physical activity</b>                                                                                    |             |               |               |
| Very difficult                                                                                              | 60 (11.1%)  | 40 (11.1%)    | 19 (11.3%)    |
| Difficult                                                                                                   | 109 (20.2%) | 67 (18.7%)    | 40 (23.8%)    |
| Moderate                                                                                                    | 145 (26.9%) | 96 (26.7%)    | 44 (26.2%)    |
| Easy                                                                                                        | 127 (23.6%) | 83 (23.1%)    | 41 (24.4%)    |
| Very easy                                                                                                   | 98 (18.2%)  | 73 (20.3%)    | 24 (14.3%)    |
| <b>Medication</b>                                                                                           |             |               |               |
| Very difficult                                                                                              | 55 (9.8%)   | 34 (9.0%)     | 19 (11.0%)    |
| Difficult                                                                                                   | 102 (18.1%) | 66 (17.5%)    | 35 (20.3%)    |
| Moderate                                                                                                    | 147 (26.1%) | 94 (24.9%)    | 48 (27.9%)    |
| Easy                                                                                                        | 138 (24.5%) | 100 (26.5%)   | 33 (19.2%)    |
| Very easy                                                                                                   | 122 (21.6%) | 83 (22.0%)    | 37 (21.5%)    |
| <b>Emotional wellbeing</b>                                                                                  |             |               |               |
| Very difficult                                                                                              | 89 (16.0%)  | 61 (16.2%)    | 26 (15.5%)    |
| Difficult                                                                                                   | 130 (23.4%) | 96 (25.5%)    | 32 (19.0%)    |
| Moderate                                                                                                    | 166 (29.9%) | 103 (27.4%)   | 58 (34.5%)    |
| Easy                                                                                                        | 97 (17.5%)  | 66 (17.6%)    | 30 (17.9%)    |
| Very easy                                                                                                   | 73 (13.2%)  | 50 (13.3%)    | 22 (13.1%)    |
| <b>Diabetes management (if showing symptoms)</b>                                                            |             |               |               |
| Very difficult                                                                                              | 57 (18.7%)  | 40 (18.1%)    | 16 (20.0%)    |
| Difficult                                                                                                   | 58 (19.0%)  | 43 (19.5%)    | 13 (16.3%)    |
| Moderate                                                                                                    | 84 (27.5%)  | 55 (24.9%)    | 29 (36.3%)    |
| Easy                                                                                                        | 55 (18.0%)  | 47 (21.3%)    | 8 (10.0%)     |
| Very easy                                                                                                   | 51 (16.7%)  | 36 (16.3%)    | 14 (17.5%)    |
| <b>Physical/social distancing</b>                                                                           |             |               |               |
| Very difficult                                                                                              | 67 (11.1%)  | 47 (11.5%)    | 17 (9.5%)     |
| Difficult                                                                                                   | 101 (16.7%) | 77 (18.8%)    | 21 (11.7%)    |
| Moderate                                                                                                    | 165 (27.4%) | 114 (27.9%)   | 48 (26.8%)    |
| Easy                                                                                                        | 143 (23.7%) | 98 (24.0%)    | 41 (22.9%)    |
| Very easy                                                                                                   | 127 (21.1%) | 73 (17.8%)    | 52 (29.1%)    |
| <b>How would you rate the QUALITY of the information/advice/support from the following sources or</b>       | <b>All</b>  | <b>Type 1</b> | <b>Type 2</b> |

## Supplementary file 2: support needs of people living with diabetes during COVID-19

|                        |             |             |            |
|------------------------|-------------|-------------|------------|
| <b>channels?</b>       |             |             |            |
| <b>Government</b>      |             |             |            |
| Very poor              | 105 (14.5%) | 73 (14.3%)  | 28 (14.1%) |
| Poor                   | 178 (24.5%) | 140 (27.5%) | 35 (17.6%) |
| Average                | 209 (28.8%) | 137 (26.9%) | 67 (33.7%) |
| Good                   | 158 (21.8%) | 109 (21.4%) | 46 (23.1%) |
| Very good              | 76 (10.5%)  | 50 (9.8%)   | 23 (11.6%) |
| <b>Diabetes UK</b>     |             |             |            |
| Very poor              | 14 (2.2%)   | 10 (2.2%)   | 4 (2.2%)   |
| Poor                   | 34 (5.2%)   | 23 (5.0%)   | 10 (5.6%)  |
| Average                | 152 (23.4%) | 110 (24.0%) | 38 (21.3%) |
| Good                   | 293 (45.1%) | 212 (46.3%) | 76 (42.7%) |
| Very good              | 157 (24.2%) | 103 (22.5%) | 50 (28.1%) |
| <b>Social media</b>    |             |             |            |
| Very poor              | 56 (9.0%)   | 41 (9.5%)   | 15 (8.6%)  |
| Poor                   | 150 (24.1%) | 101 (23.3%) | 43 (24.7%) |
| Average                | 221 (35.5%) | 152 (35.1%) | 63 (36.2%) |
| Good                   | 143 (23.0%) | 101 (23.3%) | 40 (23.0%) |
| Very good              | 52 (8.4%)   | 38 (8.8%)   | 13 (7.5%)  |
| <b>News channels</b>   |             |             |            |
| Very poor              | 61 (8.5%)   | 41 (8.2%)   | 18 (9.0%)  |
| Poor                   | 151 (21.1%) | 111 (22.3%) | 38 (19.1%) |
| Average                | 234 (32.7%) | 162 (32.5%) | 65 (32.7%) |
| Good                   | 214 (29.9%) | 147 (29.5%) | 61 (30.7%) |
| Very good              | 55 (7.7%)   | 37 (7.4%)   | 17 (8.5%)  |
| <b>Friends</b>         |             |             |            |
| Very poor              | 29 (4.9%)   | 19 (4.5%)   | 10 (6.3%)  |
| Poor                   | 72 (12.1%)  | 49 (11.6%)  | 21 (13.3%) |
| Average                | 229 (38.4%) | 160 (38.0%) | 63 (39.9%) |
| Good                   | 199 (33.4%) | 145 (34.4%) | 46 (29.1%) |
| Very good              | 67 (11.2%)  | 48 (11.4%)  | 18 (11.4%) |
| <b>Family</b>          |             |             |            |
| Very poor              | 23 (3.6%)   | 14 (3.1%)   | 8 (4.6%)   |
| Poor                   | 63 (9.9%)   | 43 (9.7%)   | 18 (10.3%) |
| Average                | 206 (32.3%) | 146 (32.8%) | 54 (31.0%) |
| Good                   | 229 (35.9%) | 162 (36.4%) | 60 (34.5%) |
| Very good              | 116 (18.2%) | 80 (18.0%)  | 34 (19.5%) |
| <b>Employer</b>        |             |             |            |
| Very poor              | 80 (17.8%)  | 56 (16.5%)  | 22 (22.4%) |
| Poor                   | 65 (14.4%)  | 48 (14.1%)  | 15 (15.3%) |
| Average                | 113 (25.1%) | 79 (23.2%)  | 30 (30.6%) |
| Good                   | 121 (26.9%) | 99 (29.1%)  | 19 (19.4%) |
| Very good              | 71 (15.8%)  | 58 (17.1%)  | 12 (12.2%) |
| <b>Healthcare team</b> |             |             |            |
| Very poor              | 108 (18.0%) | 71 (16.9%)  | 36 (22.2%) |
| Poor                   | 115 (19.2%) | 77 (18.3%)  | 34 (21.0%) |
| Average                | 116 (19.4%) | 83 (19.7%)  | 30 (18.5%) |
| Good                   | 140 (23.4%) | 101 (24.0%) | 35 (21.6%) |
| Very good              | 120 (20.0%) | 89 (21.1%)  | 27 (16.7%) |

## Supplementary file 2: support needs of people living with diabetes during COVID-19

| Nation/Region of England | n   | Healthcare rating good or very good | %    |
|--------------------------|-----|-------------------------------------|------|
| Scotland                 | 65  | 26                                  | 40.0 |
| Wales                    | 28  | 13                                  | 46.4 |
| East England             | 45  | 20                                  | 44.4 |
| East Midlands            | 32  | 13                                  | 40.6 |
| Greater London           | 47  | 20                                  | 42.6 |
| North East               | 19  | 4                                   | 21.1 |
| North West               | 51  | 21                                  | 41.2 |
| Northern Ireland         | 13  | 5                                   | 38.5 |
| South East               | 132 | 68                                  | 51.5 |
| South West               | 114 | 55                                  | 48.3 |
| West Midlands            | 47  | 14                                  | 29.8 |

Qualitative responses regarding respondents' views on way to improve the information, advice and support from the sources above are summarised in the manuscript appendices.

**Personal support networks**

| For the next questions, please consider your current network of family, friends, contacts.    | All         | Living with others | Living alone |
|-----------------------------------------------------------------------------------------------|-------------|--------------------|--------------|
| <b>How would you rate their understanding of your CURRENT diabetes self-management needs?</b> |             |                    |              |
| Very poor                                                                                     | 34 (4.5%)   | 25 (3.9%)          | 9 (7.9%)     |
| Poor                                                                                          | 98 (13.0%)  | 82 (12.8%)         | 16 (14.0%)   |
| Average                                                                                       | 243 (32.1%) | 198 (30.8%)        | 45 (39.5%)   |
| Good                                                                                          | 225 (29.7%) | 196 (30.5%)        | 29 (25.4%)   |
| Very good                                                                                     | 157 (20.7%) | 142 (22.1%)        | 15 (13.2%)   |
| <b>How would you rate their support in your diabetes self-management during the pandemic?</b> |             |                    |              |
| Very poor                                                                                     | 37 (5.1%)   | 29 (4.6%)          | 8 (7.5%)     |
| Poor                                                                                          | 76 (10.4%)  | 64 (10.2%)         | 12 (11.2%)   |
| Average                                                                                       | 181 (24.7%) | 148 (23.6%)        | 33 (30.8%)   |
| Good                                                                                          | 240 (32.7%) | 204 (32.6%)        | 36 (33.6%)   |
| Very good                                                                                     | 199 (27.2%) | 181 (28.9%)        | 18 (16.8%)   |

| How has the support you are receiving changed since before the pandemic? (0 = stayed the same) | All          | Type 1       | Type 2       |
|------------------------------------------------------------------------------------------------|--------------|--------------|--------------|
| Decreased                                                                                      | 144 (18.8%)  | 92 (17.4%)   | 49 (22.6%)   |
| Same                                                                                           | 405 (53.0%)  | 284 (53.7%)  | 116 (53.5%)  |
| Increased                                                                                      | 215 (28.1%)  | 153 (28.9%)  | 52 (24.0%)   |
|                                                                                                | 764 (100.0%) | 529 (100.0%) | 217 (100.0%) |

Note: score given on a Likert scale ranging from -5 (Decreased) to 5 (Increased).

| In what ways do they CURRENTLY support | All | % | Type 1 | % | Type 2 | % |
|----------------------------------------|-----|---|--------|---|--------|---|
|----------------------------------------|-----|---|--------|---|--------|---|

## Supplementary file 2: support needs of people living with diabetes during COVID-19

| your diabetes self-management? (Tick all that apply) | (n = 603*) |      | (n = 309) |      | (n = 119) |      |
|------------------------------------------------------|------------|------|-----------|------|-----------|------|
| Food shopping/preparation                            | 305        | 50.6 | 212       | 50.1 | 85        | 52.2 |
| Picking up medication                                | 292        | 48.4 | 215       | 50.8 | 69        | 42.3 |
| Essential travel                                     | 84         | 13.9 | 61        | 14.4 | 19        | 11.7 |
| Monitoring blood glucose                             | 82         | 13.6 | 59        | 14.0 | 21        | 12.9 |
| Emotional support                                    | 374        | 62.0 | 267       | 63.1 | 98        | 60.1 |
| Access to online resources                           | 65         | 10.8 | 42        | 9.9  | 21        | 12.9 |
| Prompting self-management behaviours                 | 174        | 28.9 | 121       | 28.6 | 48        | 29.5 |
| Other                                                | 26         | 4.3  | 17        | 4.0  | 4         | 2.5  |

\* 141 people said not applicable

## 2. Responses from parents, carers and partners of people living with diabetes

### 2.1. Geographical distribution of responses

| Region/nation    | n  | %    |
|------------------|----|------|
| Scotland         | 24 | 30.4 |
| Wales            | 1  | 1.3  |
| Channel Islands  | 1  | 1.3  |
| East Midlands    | 1  | 1.3  |
| East of England  | 6  | 7.6  |
| Greater London   | 7  | 8.9  |
| North East       | 4  | 5.1  |
| North West       | 10 | 12.7 |
| Northern Ireland | 2  | 2.5  |
| South East       | 5  | 6.3  |
| South West       | 15 | 19.0 |
| West Midlands    | 3  | 3.8  |

### 2.2. Demographic characteristics

|                                   | All (n=79)  |
|-----------------------------------|-------------|
| <b>Gender, n (%)</b>              |             |
| Female                            | 72 (91%)    |
| Male                              | 7 (9%)      |
| <b>Age, mean (SD)</b>             | 45.2 (10.1) |
| <b>Ethnicity, n (%)</b>           |             |
| Asian or Asian British: Pakistani | 1 (1%)      |
| Black or Black British: Caribbean | 1 (1%)      |
| Other Black background            | 1 (1%)      |
| Other ethnic group                | 1 (1%)      |
| Other White background            | 2 (3%)      |
| White: British                    | 69 (87%)    |
| White: Irish                      | 4 (5%)      |

### Living Circumstances

## Supplementary file 2: support needs of people living with diabetes during COVID-19

| Are you currently living with the person who has diabetes? | n (%)     |
|------------------------------------------------------------|-----------|
| No                                                         | 7 (9%)    |
| Yes                                                        | 72 (91%)  |
|                                                            | 79 (100%) |

| Has the number of people you are living with changed as a result of the coronavirus pandemic? | n (%)     |
|-----------------------------------------------------------------------------------------------|-----------|
| No                                                                                            | 74 (94%)  |
| Yes                                                                                           | 5 (6%)    |
|                                                                                               | 79 (100%) |

**Circumstances in relation to COVID-19**

| Have you been diagnosed with or displayed symptoms of coronavirus since the beginning of February? | n (%)     |
|----------------------------------------------------------------------------------------------------|-----------|
| No                                                                                                 | 67 (85%)  |
| Yes                                                                                                | 6 (8%)    |
| Not sure                                                                                           | 6 (8%)    |
|                                                                                                    | 79 (100%) |

| Which of the following best describes your current circumstances? | n (%)     |
|-------------------------------------------------------------------|-----------|
| Following stringent Physical/social/physical distancing           | 51 (65%)  |
| Self-isolating at home                                            | 3 (4%)    |
| Shielding group                                                   | 4 (5%)    |
| Shielding (but not in shielding group)                            | 0 (0%)    |
| Key worker/still leaving home to work                             | 19 (24%)  |
| Minimising interactions to protect someone in household           | 2 (3%)    |
|                                                                   | 79 (100%) |

*2.3. Confidence in the ability to support diabetes self-management*

| BEFORE the coronavirus pandemic and social/physical distancing guidance I was confident that... | N  | Median (IQR) |
|-------------------------------------------------------------------------------------------------|----|--------------|
| Check blood glucose                                                                             | 64 | 10 (10, 10)  |
| Correct high blood glucose                                                                      | 68 | 10 (8, 10)   |
| Correct low blood glucose                                                                       | 66 | 10 (10, 10)  |
| Good blood glucose regulation                                                                   | 58 | 10 (8, 10)   |
| Choose correct foods                                                                            | 75 | 10 (7, 10)   |
| Keep healthy weight                                                                             | 72 | 8 (5, 10)    |
| Examine feet                                                                                    | 78 | 10 (5, 10)   |

## Supplementary file 2: support needs of people living with diabetes during COVID-19

|                        |    |           |
|------------------------|----|-----------|
| Healthy eating pattern | 78 | 8 (6, 10) |
| Physical activity      | 78 | 8 (6, 10) |
| Mental wellbeing       | 78 | 8 (6, 9)  |

Note: score given on a Likert scale ranging from 0 (Could not do at all) to 10 (Certain could do). Not applicable was also an option to account inter-individual variability in condition and self-management requirements.

| AT PRESENT, I am confident that... | N  | Median (IQR) |
|------------------------------------|----|--------------|
| Check blood glucose                | 68 | 10 (10, 10)  |
| Correct high blood glucose         | 70 | 10 (8, 10)   |
| Correct low blood glucose          | 67 | 10 (9, 10)   |
| Good blood glucose regulation      | 57 | 10 (8, 10)   |
| Choose correct foods               | 75 | 10 (8, 10)   |
| Keep healthy weight                | 72 | 8 (5, 10)    |
| Examine feet                       | 78 | 10 (5, 10)   |
| Healthy eating pattern             | 78 | 8 (6, 10)    |
| Physical activity                  | 78 | 8 (4, 10)    |
| Mental wellbeing                   | 78 | 8 (6, 9)     |

Note: score given on a Likert scale ranging from 0 (Could not do at all) to 10 (Certain could do). Not applicable was also an option to account inter-individual variability in condition and self-management requirements.

| Change in score                      | All      |
|--------------------------------------|----------|
| <b>Check blood glucose</b>           |          |
| Decreased                            | 4 (6%)   |
| Same                                 | 55 (87%) |
| Increased                            | 4 (6%)   |
| <b>Correct high blood glucose</b>    |          |
| Decreased                            | 6 (9%)   |
| Same                                 | 50 (76%) |
| Increased                            | 10 (15%) |
| <b>Correct low blood glucose</b>     |          |
| Decreased                            | 9 (14%)  |
| Same                                 | 51 (78%) |
| Increased                            | 5 (8%)   |
| <b>Good blood glucose regulation</b> |          |
| Decreased                            | 7 (13%)  |
| Same                                 | 38 (68%) |
| Increased                            | 11 (20%) |
| <b>Choose correct foods</b>          |          |
| Decreased                            | 16 (22%) |
| Same                                 | 40 (54%) |
| Increased                            | 18 (24%) |
| <b>Keep healthy weight</b>           |          |
| Decreased                            | 15 (22%) |
| Same                                 | 39 (57%) |
| Increased                            | 15 (22%) |
| <b>Examine feet</b>                  |          |

## Supplementary file 2: support needs of people living with diabetes during COVID-19

|                               |          |
|-------------------------------|----------|
| Decreased                     | 7 (9%)   |
| Same                          | 63 (82%) |
| Increased                     | 7 (9%)   |
| <b>Healthy eating pattern</b> |          |
| Decreased                     | 20 (26%) |
| Same                          | 45 (58%) |
| Increased                     | 12 (16%) |
| <b>Physical activity</b>      |          |
| Decreased                     | 21 (27%) |
| Same                          | 49 (64%) |
| Increased                     | 7 (9%)   |
| <b>Mental wellbeing</b>       |          |
| Decreased                     | 20 (26%) |
| Same                          | 48 (62%) |
| Increased                     | 9 (12%)  |

## 2.4. Sources used for information, advice and support

| Which of these resources have you used for guidance on how you should behave regarding social/physical distancing measures in relation to the person with diabetes? (Tick all that apply) | n<br>(All = 78) | %  |
|-------------------------------------------------------------------------------------------------------------------------------------------------------------------------------------------|-----------------|----|
| News channels                                                                                                                                                                             | 47              | 60 |
| Public Health and government website                                                                                                                                                      | 33              | 42 |
| Diabetes UK website                                                                                                                                                                       | 47              | 60 |
| NHS website                                                                                                                                                                               | 47              | 60 |
| Other website                                                                                                                                                                             | 3               | 4  |
| Twitter                                                                                                                                                                                   | 8               | 10 |
| Facebook                                                                                                                                                                                  | 19              | 24 |
| GP, diabetes nurse, healthcare professional                                                                                                                                               | 31              | 40 |
| Family                                                                                                                                                                                    | 19              | 24 |
| Friends                                                                                                                                                                                   | 8               | 10 |
| Employer                                                                                                                                                                                  | 5               | 6  |
| Diabetes support group                                                                                                                                                                    | 12              | 15 |
| Other                                                                                                                                                                                     | 5               | 6  |

| Which one have you use the most? (Tick one) | n  | %  |
|---------------------------------------------|----|----|
| News channels                               | 26 | 34 |
| Public Health and government website        | 9  | 12 |
| Diabetes UK website                         | 8  | 10 |
| NHS website                                 | 10 | 13 |
| Other website                               | 0  | 0  |
| Twitter                                     | 2  | 3  |
| Facebook                                    | 4  | 5  |
| GP, diabetes nurse, healthcare professional | 9  | 12 |
| Family                                      | 3  | 4  |
| Friends                                     | 0  | 0  |
| Employer                                    | 1  | 1  |
| Diabetes support group                      | 4  | 5  |
| Other                                       | 0  | 0  |



## Supplementary file 2: support needs of people living with diabetes during COVID-19

|  |    |     |
|--|----|-----|
|  | 77 | 100 |
|--|----|-----|

| Which of these resources have you been using for guidance on general diabetes management since the start of the pandemic? (Tick all that apply) | n<br>(All = 75) | %  |
|-------------------------------------------------------------------------------------------------------------------------------------------------|-----------------|----|
| News channels                                                                                                                                   | 19              | 25 |
| Public Health and government website                                                                                                            | 11              | 15 |
| Diabetes UK website                                                                                                                             | 37              | 49 |
| NHS website                                                                                                                                     | 26              | 35 |
| Other website                                                                                                                                   | 3               | 4  |
| Twitter                                                                                                                                         | 2               | 3  |
| Facebook                                                                                                                                        | 12              | 16 |
| GP, diabetes nurse, healthcare professional                                                                                                     | 24              | 32 |
| Family                                                                                                                                          | 5               | 7  |
| Friends                                                                                                                                         | 1               | 1  |
| Employer                                                                                                                                        | 1               | 1  |
| Diabetes support group                                                                                                                          | 11              | 15 |
| Other                                                                                                                                           | 1               | 1  |

| Which of these resources do you use to obtain emotional support? (Tick all that apply) | n<br>(All = 70) | %  |
|----------------------------------------------------------------------------------------|-----------------|----|
| Diabetes UK website – online forum                                                     | 6               | 9  |
| Diabetes UK helpline                                                                   | 1               | 1  |
| Facebook groups                                                                        | 12              | 17 |
| GP, diabetes nurse, healthcare professional                                            | 12              | 17 |
| Family                                                                                 | 42              | 60 |
| Friends                                                                                | 25              | 36 |
| Neighbour                                                                              | 0               | 0  |
| Employer                                                                               | 1               | 1  |
| Diabetes support group                                                                 | 7               | 10 |
| Other                                                                                  | 2               | 3  |

| Which means do you use to obtain advice/guidance/support from outside your household? (tick all that apply) | All<br>(n = 70*) | %  |
|-------------------------------------------------------------------------------------------------------------|------------------|----|
| Telephone                                                                                                   | 23               | 33 |
| Computer                                                                                                    | 39               | 56 |
| Mobile phone                                                                                                | 50               | 71 |
| Someone in the house                                                                                        | 8                | 11 |
| Other                                                                                                       | 0                | 0  |

\*7 people said not applicable

## Supplementary file 2: support needs of people living with diabetes during COVID-19

## 2.5. Opinions on information, advice, and support received

| In general, how difficult or easy has it been for you to obtain INFORMATION/ADVICE applicable to the person you are helping on the following? | n (%)    |
|-----------------------------------------------------------------------------------------------------------------------------------------------|----------|
| <b>Glucose control</b>                                                                                                                        |          |
| Very difficult                                                                                                                                | 4 (6%)   |
| Difficult                                                                                                                                     | 12 (18%) |
| Moderate                                                                                                                                      | 17 (25%) |
| Easy                                                                                                                                          | 21 (31%) |
| Very easy                                                                                                                                     | 14 (21%) |
| <b>Diet</b>                                                                                                                                   |          |
| Very difficult                                                                                                                                | 4 (6%)   |
| Difficult                                                                                                                                     | 13 (19%) |
| Moderate                                                                                                                                      | 11 (16%) |
| Easy                                                                                                                                          | 24 (35%) |
| Very easy                                                                                                                                     | 16 (24%) |
| <b>Physical activity</b>                                                                                                                      |          |
| Very difficult                                                                                                                                | 2 (3%)   |
| Difficult                                                                                                                                     | 13 (19%) |
| Moderate                                                                                                                                      | 14 (20%) |
| Easy                                                                                                                                          | 23 (33%) |
| Very easy                                                                                                                                     | 17 (25%) |
| <b>Medication</b>                                                                                                                             |          |
| Very difficult                                                                                                                                | 5 (7%)   |
| Difficult                                                                                                                                     | 13 (18%) |
| Moderate                                                                                                                                      | 16 (23%) |
| Easy                                                                                                                                          | 22 (31%) |
| Very easy                                                                                                                                     | 15 (21%) |
| <b>Emotional wellbeing</b>                                                                                                                    |          |
| Very difficult                                                                                                                                | 12 (17%) |
| Difficult                                                                                                                                     | 12 (17%) |
| Moderate                                                                                                                                      | 19 (27%) |
| Easy                                                                                                                                          | 15 (21%) |
| Very easy                                                                                                                                     | 13 (18%) |
| <b>Diabetes management (if showing symptoms)</b>                                                                                              |          |
| Very difficult                                                                                                                                | 8 (21%)  |
| Difficult                                                                                                                                     | 10 (26%) |
| Moderate                                                                                                                                      | 9 (24%)  |
| Easy                                                                                                                                          | 3 (8%)   |
| Very easy                                                                                                                                     | 8 (21%)  |
| <b>Physical/social distancing</b>                                                                                                             |          |
| Very difficult                                                                                                                                | 10 (14%) |
| Difficult                                                                                                                                     | 9 (12%)  |
| Moderate                                                                                                                                      | 16 (22%) |
| Easy                                                                                                                                          | 23 (31%) |
| Very easy                                                                                                                                     | 16 (22%) |

## Supplementary file 2: support needs of people living with diabetes during COVID-19

| In general, how difficult or easy has it been for you to obtain SUPPORT applicable to the person you are helping on the following? | n (%)    |
|------------------------------------------------------------------------------------------------------------------------------------|----------|
| <b>Glucose control</b>                                                                                                             |          |
| Very difficult                                                                                                                     | 8 (13%)  |
| Difficult                                                                                                                          | 10 (16%) |
| Moderate                                                                                                                           | 12 (19%) |
| Easy                                                                                                                               | 16 (26%) |
| Very easy                                                                                                                          | 16 (26%) |
| <b>Diet</b>                                                                                                                        |          |
| Very difficult                                                                                                                     | 7 (11%)  |
| Difficult                                                                                                                          | 7 (11%)  |
| Moderate                                                                                                                           | 15 (24%) |
| Easy                                                                                                                               | 19 (30%) |
| Very easy                                                                                                                          | 15 (24%) |
| <b>Physical activity</b>                                                                                                           |          |
| Very difficult                                                                                                                     | 6 (10%)  |
| Difficult                                                                                                                          | 10 (16%) |
| Moderate                                                                                                                           | 13 (21%) |
| Easy                                                                                                                               | 21 (33%) |
| Very easy                                                                                                                          | 13 (21%) |
| <b>Medication</b>                                                                                                                  |          |
| Very difficult                                                                                                                     | 7 (11%)  |
| Difficult                                                                                                                          | 7 (11%)  |
| Moderate                                                                                                                           | 13 (20%) |
| Easy                                                                                                                               | 20 (31%) |
| Very easy                                                                                                                          | 17 (27%) |
| <b>Emotional wellbeing</b>                                                                                                         |          |
| Very difficult                                                                                                                     | 16 (25%) |
| Difficult                                                                                                                          | 6 (9%)   |
| Moderate                                                                                                                           | 17 (26%) |
| Easy                                                                                                                               | 13 (20%) |
| Very easy                                                                                                                          | 13 (20%) |
| <b>Diabetes management (if showing symptoms)</b>                                                                                   |          |
| Very difficult                                                                                                                     | 9 (26%)  |
| Difficult                                                                                                                          | 5 (15%)  |
| Moderate                                                                                                                           | 8 (24%)  |
| Easy                                                                                                                               | 4 (12%)  |
| Very easy                                                                                                                          | 8 (24%)  |
| <b>Physical/social distancing</b>                                                                                                  |          |
| Very difficult                                                                                                                     | 10 (16%) |
| Difficult                                                                                                                          | 10 (16%) |
| Moderate                                                                                                                           | 13 (20%) |
| Easy                                                                                                                               | 16 (25%) |
| Very easy                                                                                                                          | 15 (23%) |

## Supplementary file 2: support needs of people living with diabetes during COVID-19

| How would you rate the QUALITY of the information/advice/support from the following sources or channels? | n (%)    |
|----------------------------------------------------------------------------------------------------------|----------|
| <b>Government</b>                                                                                        |          |
| Very poor                                                                                                | 11 (14%) |
| Poor                                                                                                     | 15 (19%) |
| Average                                                                                                  | 23 (30%) |
| Good                                                                                                     | 19 (25%) |
| Very good                                                                                                | 9 (12%)  |
| <b>Diabetes UK</b>                                                                                       |          |
| Very poor                                                                                                | 1 (1%)   |
| Poor                                                                                                     | 3 (4%)   |
| Average                                                                                                  | 13 (19%) |
| Good                                                                                                     | 29 (42%) |
| Very good                                                                                                | 23 (33%) |
| <b>Social media</b>                                                                                      |          |
| Very poor                                                                                                | 7 (10%)  |
| Poor                                                                                                     | 9 (13%)  |
| Average                                                                                                  | 29 (43%) |
| Good                                                                                                     | 18 (26%) |
| Very good                                                                                                | 5 (7%)   |
| <b>News channels</b>                                                                                     |          |
| Very poor                                                                                                | 8 (11%)  |
| Poor                                                                                                     | 16 (23%) |
| Average                                                                                                  | 24 (34%) |
| Good                                                                                                     | 14 (20%) |
| Very good                                                                                                | 9 (13%)  |
| <b>Friends</b>                                                                                           |          |
| Very poor                                                                                                | 4 (7%)   |
| Poor                                                                                                     | 7 (12%)  |
| Average                                                                                                  | 22 (38%) |
| Good                                                                                                     | 19 (33%) |
| Very good                                                                                                | 6 (10%)  |
| <b>Family</b>                                                                                            |          |
| Very poor                                                                                                | 4 (6%)   |
| Poor                                                                                                     | 8 (13%)  |
| Average                                                                                                  | 22 (34%) |
| Good                                                                                                     | 20 (31%) |
| Very good                                                                                                | 10 (16%) |
| <b>Employer</b>                                                                                          |          |
| Very poor                                                                                                | 8 (18%)  |
| Poor                                                                                                     | 10 (23%) |
| Average                                                                                                  | 16 (36%) |
| Good                                                                                                     | 8 (18%)  |
| Very good                                                                                                | 2 (5%)   |
| <b>Healthcare team</b>                                                                                   |          |
| Very poor                                                                                                | 3 (5%)   |
| Poor                                                                                                     | 10 (15%) |
| Average                                                                                                  | 13 (20%) |
| Good                                                                                                     | 14 (22%) |

## Supplementary file 2: support needs of people living with diabetes during COVID-19

|           |          |
|-----------|----------|
| Very good | 25 (38%) |
|-----------|----------|

## 2.6. Own role in supporting someone with diabetes

| How would you rate your understanding of their CURRENT diabetes self-management needs? | n (%)    |
|----------------------------------------------------------------------------------------|----------|
| Very poor                                                                              | 1 (1%)   |
| Poor                                                                                   | 3 (4%)   |
| Average                                                                                | 11 (14%) |
| Good                                                                                   | 26 (33%) |
| Very good                                                                              | 37 (47%) |

| In what ways do you CURRENTLY support the individual in their diabetes self-management? (Tick all that apply) | n = 78* | %  |
|---------------------------------------------------------------------------------------------------------------|---------|----|
| Food shopping/preparation                                                                                     | 69      | 88 |
| Picking up medication                                                                                         | 67      | 86 |
| Essential travel                                                                                              | 49      | 63 |
| Monitoring blood glucose                                                                                      | 49      | 63 |
| Emotional support                                                                                             | 69      | 88 |
| Access to online resources                                                                                    | 41      | 53 |
| Prompting self-management behaviours                                                                          | 69      | 88 |
| Other                                                                                                         | 6       | 8  |

\*1 person said not applicable
