# Supplementary material
Source: HighWire-hosted journal article supplement (https://drc.bmj.com/content/9/1/e002162)
Supplement: inline-supplementary-material-3 [file inline-supplementary-material-3.pdf]

## Supplementary File 3: support needs of people living with diabetes during COVID-19

**Supplementary File 3****Title: Addressing support needs of people living with diabetes during the coronavirus COVID-19 pandemic: insights from a UK survey.**Sarah Sauchelli\*<sup>1</sup>, Julia Bradley<sup>1</sup>, Clare England<sup>1</sup>, Aidan Searle<sup>1</sup>, Alex Whitmarsh<sup>1</sup><sup>1</sup> National Institute for Health Research Bristol Biomedical Research Centre, University Hospitals of Bristol and Weston NHS Foundation Trust and University of Bristol.

Three timepoints were identified in responses (24<sup>th</sup> of June, 20<sup>th</sup> of July, and 17<sup>th</sup> of August). Response times matched ( $\pm 2$  days) major recruitment efforts but could not be linked to changes in government guidelines. Sample sizes were not sufficiently large to compare data across these time points but the data can be seen in Supplementary File 3. Here, survey responses are presented split across the three recruitment peaks.

**Responses to the survey****1. Responses from people living with diabetes***1.1. Geographical distribution of responses*

|                    | Before July |              | July       |              | August     |              |
|--------------------|-------------|--------------|------------|--------------|------------|--------------|
|                    | n           | %            | n          | %            | n          | %            |
| Scotland           | 50          | 17.9         | 28         | 8.8          | 11         | 6.6          |
| Wales              | 3           | 1.1          | 23         | 7.2          | 6          | 3.6          |
| East Midlands      | 1           | 0.4          | 18         | 5.6          | 12         | 7.2          |
| East of England    | 7           | 2.5          | 30         | 9.4          | 15         | 9.0          |
| Greater London     | 10          | 3.6          | 37         | 11.6         | 18         | 10.8         |
| North East         | 2           | 0.7          | 7          | 2.2          | 5          | 3.0          |
| North West         | 3           | 1.1          | 34         | 10.6         | 18         | 10.8         |
| Northern Ireland   | 2           | 0.7          | 7          | 2.2          | 5          | 3.0          |
| South East         | 132         | 47.3         | 37         | 11.6         | 24         | 14.5         |
| South West         | 60          | 21.5         | 52         | 16.3         | 30         | 18.1         |
| West Midlands      | 8           | 2.9          | 34         | 10.6         | 15         | 9.0          |
| Yorkshire & Humber | 1           | 0.4          | 13         | 4.1          | 7          | 4.2          |
| <b>Total</b>       | <b>279</b>  | <b>100.0</b> | <b>320</b> | <b>100.0</b> | <b>166</b> | <b>100.0</b> |

*1.2. Demographic characteristics.*

|                          | Before July |       | July |       | August |       |
|--------------------------|-------------|-------|------|-------|--------|-------|
|                          | n           | %     | n    | %     | n      | %     |
| <b>Diabetes group</b>    |             |       |      |       |        |       |
| Type 1 diabetes          | 196         | 69.8  | 228  | 70.4  | 111    | 66.1  |
| Type 2 diabetes          | 77          | 27.4  | 90   | 27.8  | 53     | 31.5  |
| Another type of diabetes | 8           | 2.8   | 6    | 1.9   | 4      | 2.4   |
|                          | 281         | 100.0 | 324  | 100.0 | 168    | 100.0 |

Supplementary File 3: support needs of people living with diabetes during COVID-19

## Supplementary File 3: support needs of people living with diabetes during COVID-19

|                                   | Before July<br>(n=281) | July<br>(n=324) | August<br>(n=168) |
|-----------------------------------|------------------------|-----------------|-------------------|
| <b>Gender, n (%)</b>              |                        |                 |                   |
| Female                            | 162 (57.9%)            | 235 (73.2%)     | 119 (70.8%)       |
| Male                              | 115 (41.1%)            | 85 (26.5%)      | 49 (29.2%)        |
| Other                             | 3 (1.1%)               | 1 (0.3%)        | 0 (0.0%)          |
| <b>Age, mean (SD)</b>             | 50.2 (14.7)            | 45.2 (14.2)     | 49.5 (14.0)       |
| <b>Ethnicity, n (%)</b>           |                        |                 |                   |
| Arab                              | 1 (0.4%)               | 0 (0.0%)        | 0 (0.0%)          |
| Asian or Asian British: Chinese   | 1 (0.4%)               | 1 (0.3%)        | 1 (0.6%)          |
| Asian or Asian British: Indian    | 2 (0.7%)               | 4 (1.2%)        | 2 (1.2%)          |
| Asian or Asian British: Pakistani | 0 (0.0%)               | 0 (0.0%)        | 1 (0.6%)          |
| Black or Black British: Caribbean | 1 (0.4%)               | 2 (0.6%)        | 1 (0.6%)          |
| Mixed: White and Asian            | 4 (1.4%)               | 1 (0.3%)        | 0 (0.0%)          |
| Mixed: White and Black African    | 0 (0.0%)               | 1 (0.3%)        | 0 (0.0%)          |
| Mixed: White and Black Caribbean  | 0 (0.0%)               | 1 (0.3%)        | 0 (0.0%)          |
| Other ethnic group                | 0 (0.0%)               | 0 (0.0%)        | 1 (0.6%)          |
| Other Mixed background            | 14 (5.0%)              | 13 (4.0%)       | 4 (2.4%)          |
| Other White background            | 0 (0.0%)               | 1 (0.3%)        | 0 (0.0%)          |
| Prefer not to answer              | 3 (1.1%)               | 0 (0.0%)        | 0 (0.0%)          |
| White: British                    | 251 (89.6%)            | 286 (89.1%)     | 156 (92.9%)       |
| White: Irish                      | 3 (1.1%)               | 11 (3.4%)       | 2 (1.2%)          |

**Living circumstances**

| Are you currently living alone? | Before July  | July         | August       |
|---------------------------------|--------------|--------------|--------------|
| No                              | 227 (81.1%)  | 277 (85.5%)  | 145 (86.3%)  |
| Yes                             | 53 (18.9%)   | 47 (14.5%)   | 23 (13.7%)   |
|                                 | 280 (100.0%) | 324 (100.0%) | 168 (100.0%) |

| Has the number of people you are living with changed as a result of the coronavirus pandemic? | Before July  | July         | August       |
|-----------------------------------------------------------------------------------------------|--------------|--------------|--------------|
| No                                                                                            | 248 (88.3%)  | 288 (89.4%)  | 148 (89.2%)  |
| Yes                                                                                           | 33 (11.7%)   | 34 (10.6%)   | 18 (10.8%)   |
|                                                                                               | 281 (100.0%) | 322 (100.0%) | 166 (100.0%) |

## Supplementary File 3: support needs of people living with diabetes during COVID-19

**Circumstances in relation to COVID-19**

| Have you been diagnosed with or displayed symptoms of coronavirus since the beginning of February? | Before July  | July         | August       |
|----------------------------------------------------------------------------------------------------|--------------|--------------|--------------|
| No                                                                                                 | 232 (83.2%)  | 255 (78.9%)  | 136 (81.4%)  |
| Yes                                                                                                | 22 (7.9%)    | 30 (9.3%)    | 18 (10.8%)   |
| Diagnosed with coronavirus                                                                         | 0 (0.0%)     | 1 (0.3%)     | 1 (0.6%)     |
| Not sure                                                                                           | 25 (9.0%)    | 37 (11.5%)   | 12 (7.2%)    |
|                                                                                                    | 279 (100.0%) | 323 (100.0%) | 167 (100.0%) |

| Which of the following best describes your current circumstances? | Before July  | July         | August       |
|-------------------------------------------------------------------|--------------|--------------|--------------|
| Following stringent Physical/social/physical distancing           | 174 (61.9%)  | 215 (67.0%)  | 124 (74.7%)  |
| Self-isolating at home                                            | 12 (4.3%)    | 1 (0.3%)     | 3 (1.8%)     |
| Shielding group                                                   | 22 (7.8%)    | 27 (8.4%)    | 10 (6.0%)    |
| Shielding (but not in shielding group)                            | 39 (13.9%)   | 31 (9.7%)    | 5 (3.0%)     |
| Key worker/still leaving home to work                             | 30 (10.7%)   | 44 (13.7%)   | 23 (13.9%)   |
| Other                                                             | 3 (1.1%)     | 0 (0.0%)     | 1 (0.6%)     |
| Don't know                                                        | 1 (0.4%)     | 3 (0.9%)     | 0 (0.0%)     |
|                                                                   | 281 (100.0%) | 321 (100.0%) | 166 (100.0%) |

*1.3. Confidence in diabetes self-management*

| BEFORE the coronavirus pandemic and social/physical distancing guidance I was confident that I was able to... | Before July |              | July |              | August |              |
|---------------------------------------------------------------------------------------------------------------|-------------|--------------|------|--------------|--------|--------------|
|                                                                                                               | n           | Median (IQR) | n    | Median (IQR) | n      | Median (IQR) |
| Check blood glucose                                                                                           | 259         | 10 (10, 10)  | 302  | 10 (10, 10)  | 159    | 10 (10, 10)  |
| Correct high blood glucose                                                                                    | 258         | 10 (8, 10)   | 293  | 10 (8, 10)   | 152    | 10 (8, 10)   |
| Correct low blood glucose                                                                                     | 250         | 10 (9, 10)   | 285  | 10 (9, 10)   | 145    | 10 (10, 10)  |
| Good blood glucose regulation                                                                                 | 207         | 10 (8, 10)   | 233  | 9 (7, 10)    | 131    | 10 (7, 10)   |
| Choose correct foods                                                                                          | 262         | 10 (8, 10)   | 309  | 10 (7, 10)   | 158    | 10 (8, 10)   |
| Keep healthy weight                                                                                           | 274         | 8 (5, 10)    | 317  | 6 (4, 9)     | 164    | 8 (4, 10)    |
| Examine feet                                                                                                  | 277         | 10 (9, 10)   | 324  | 10 (8, 10)   | 168    | 10 (8, 10)   |
| Healthy eating pattern                                                                                        | 278         | 9 (7, 10)    | 324  | 8 (6, 10)    | 168    | 8 (6, 10)    |
| Physical activity                                                                                             | 278         | 8 (6, 10)    | 324  | 7 (5, 10)    | 168    | 8 (5, 10)    |
| Mental wellbeing                                                                                              | 279         | 8 (6, 10)    | 324  | 7 (5, 9)     | 167    | 8 (5, 10)    |

Note: score given on a Likert scale ranging from 0 (Could not do at all) to 10 (Certain could do). Not applicable was also an option to account inter-individual variability in condition and self-management requirements.

| AT PRESENT, I am confident that... | Before July |              | July |              | August |              |
|------------------------------------|-------------|--------------|------|--------------|--------|--------------|
|                                    | n           | Median (IQR) | n    | Median (IQR) | n      | Median (IQR) |
| Check blood glucose                | 264         | 10 (10, 10)  | 304  | 10 (10, 10)  | 159    | 10 (10, 10)  |
| Correct high blood glucose         | 263         | 10 (8, 10)   | 302  | 9 (8, 10)    | 153    | 10 (8, 10)   |
| Correct low blood glucose          | 258         | 10 (9, 10)   | 288  | 10 (9, 10)   | 151    | 10 (9, 10)   |
| Good blood glucose                 | 211         | 10 (8, 10)   | 234  | 9 (7, 10)    | 133    | 10 (7, 10)   |

## Supplementary File 3: support needs of people living with diabetes during COVID-19

|                        |     |            |     |            |     |            |
|------------------------|-----|------------|-----|------------|-----|------------|
| regulation             |     |            |     |            |     |            |
| Choose correct foods   | 267 | 10 (8, 10) | 315 | 9 (7, 10)  | 162 | 10 (8, 10) |
| Keep healthy weight    | 277 | 7 (5, 10)  | 318 | 6 (3, 9)   | 164 | 7 (4, 10)  |
| Examine feet           | 279 | 10 (8, 10) | 318 | 10 (8, 10) | 167 | 10 (8, 10) |
| Healthy eating pattern | 278 | 8 (7, 10)  | 321 | 8 (5, 10)  | 167 | 8 (7, 10)  |
| Physical activity      | 279 | 8 (5, 10)  | 322 | 6 (4, 9)   | 167 | 8 (5, 10)  |
| Mental wellbeing       | 277 | 8 (5, 10)  | 322 | 6 (4, 8)   | 166 | 8 (5, 10)  |

Note: score given on a Likert scale ranging from 0 (Could not do at all) to 10 (Certain could do). Not applicable was also an option to account inter-individual variability in condition and self-management requirements.

| Change in score                      | Before July | July        | August      |
|--------------------------------------|-------------|-------------|-------------|
| <b>Check blood glucose</b>           |             |             |             |
| Decreased                            | 14 (5.4%)   | 38 (12.8%)  | 16 (10.2%)  |
| Same                                 | 225 (87.5%) | 247 (82.9%) | 128 (81.5%) |
| Increased                            | 18 (7.0%)   | 13 (4.4%)   | 13 (8.3%)   |
| <b>Correct high blood glucose</b>    |             |             |             |
| Decreased                            | 30 (11.7%)  | 51 (17.6%)  | 14 (9.3%)   |
| Same                                 | 205 (79.8%) | 191 (65.9%) | 114 (75.5%) |
| Increased                            | 22 (8.6%)   | 48 (16.6%)  | 23 (15.2%)  |
| <b>Correct low blood glucose</b>     |             |             |             |
| Decreased                            | 29 (11.7%)  | 47 (16.7%)  | 16 (11.1%)  |
| Same                                 | 198 (80.2%) | 208 (74.0%) | 116 (80.6%) |
| Increased                            | 20 (8.1%)   | 26 (9.3%)   | 12 (8.3%)   |
| <b>Good blood glucose regulation</b> |             |             |             |
| Decreased                            | 22 (11.0%)  | 50 (22.0%)  | 20 (15.6%)  |
| Same                                 | 155 (77.5%) | 139 (61.2%) | 86 (67.2%)  |
| Increased                            | 23 (11.5%)  | 38 (16.7%)  | 22 (17.2%)  |
| <b>Choose correct foods</b>          |             |             |             |
| Decreased                            | 54 (21.1%)  | 83 (27.1%)  | 36 (22.9%)  |
| Same                                 | 170 (66.4%) | 174 (56.9%) | 96 (61.1%)  |
| Increased                            | 32 (12.5%)  | 49 (16.0%)  | 25 (15.9%)  |
| <b>Keep healthy weight</b>           |             |             |             |
| Decreased                            | 69 (25.5%)  | 96 (30.8%)  | 37 (22.8%)  |
| Same                                 | 150 (55.4%) | 155 (49.7%) | 81 (50.0%)  |
| Increased                            | 52 (19.2%)  | 61 (19.6%)  | 44 (27.2%)  |
| <b>Examine feet</b>                  |             |             |             |
| Decreased                            | 27 (9.8%)   | 49 (15.4%)  | 11 (6.6%)   |
| Same                                 | 223 (81.1%) | 239 (75.2%) | 136 (81.4%) |
| Increased                            | 25 (9.1%)   | 30 (9.4%)   | 20 (12.0%)  |
| <b>Healthy eating pattern</b>        |             |             |             |
| Decreased                            | 78 (28.4%)  | 103 (32.1%) | 45 (26.9%)  |
| Same                                 | 157 (57.1%) | 151 (47.0%) | 85 (50.9%)  |
| Increased                            | 40 (14.5%)  | 67 (20.9%)  | 37 (22.2%)  |
| <b>Physical activity</b>             |             |             |             |
| Decreased                            | 87 (31.5%)  | 114 (35.4%) | 44 (26.3%)  |
| Same                                 | 145 (52.5%) | 139 (43.2%) | 77 (46.1%)  |
| Increased                            | 44 (15.9%)  | 69 (21.4%)  | 46 (27.5%)  |
| <b>Mental wellbeing</b>              |             |             |             |

## Supplementary File 3: support needs of people living with diabetes during COVID-19

|           |             |             |            |
|-----------|-------------|-------------|------------|
| Decreased | 92 (33.5%)  | 148 (46.0%) | 42 (25.5%) |
| Same      | 157 (57.1%) | 121 (37.6%) | 84 (50.9%) |
| Increased | 26 (9.5%)   | 53 (16.5%)  | 39 (23.6%) |

## 1.4. Cancellation of clinical appointments

| Have you had to cancel diabetes appointments and check-ups because of the pandemic? | Before July  | July         | August       |
|-------------------------------------------------------------------------------------|--------------|--------------|--------------|
| No                                                                                  | 143 (50.9%)  | 135 (41.9%)  | 94 (56.0%)   |
| Yes                                                                                 | 138 (49.1%)  | 187 (58.1%)  | 74 (44.0%)   |
|                                                                                     | 281 (100.0%) | 322 (100.0%) | 168 (100.0%) |

Qualitative responses regarding the impact of the cancellation of appointments are summarised in the appendices.

## 1.5. Sources used for information, advice and support

| Which of these resources have you used for guidance on how you should behave regarding social/physical distancing measures? (Tick all that apply) | Before July (n = 279) | %    | July (n = 324) | %    | August (n = 167) | %    |
|---------------------------------------------------------------------------------------------------------------------------------------------------|-----------------------|------|----------------|------|------------------|------|
| News channels                                                                                                                                     | 217                   | 77.8 | 216            | 66.7 | 124              | 74.3 |
| Public Health and government website                                                                                                              | 125                   | 44.8 | 182            | 56.2 | 79               | 47.3 |
| Diabetes UK website                                                                                                                               | 134                   | 48.0 | 217            | 67.0 | 110              | 65.9 |
| NHS website                                                                                                                                       | 137                   | 49.1 | 175            | 54.0 | 74               | 44.3 |
| Other website                                                                                                                                     | 13                    | 4.7  | 27             | 8.3  | 12               | 7.2  |
| Social media                                                                                                                                      | 59                    | 21.2 | 113            | 34.9 | 47               | 28.1 |
| GP, diabetes nurse, healthcare professional                                                                                                       | 102                   | 36.6 | 107            | 33.0 | 52               | 31.1 |
| Family                                                                                                                                            | 67                    | 24.0 | 78             | 24.1 | 29               | 17.4 |
| Friends                                                                                                                                           | 44                    | 15.8 | 47             | 14.5 | 20               | 12.0 |
| Employer                                                                                                                                          | 45                    | 16.1 | 48             | 14.8 | 20               | 12.0 |
| Diabetes support group                                                                                                                            | 16                    | 5.7  | 36             | 11.1 | 16               | 9.0  |
| Other                                                                                                                                             | 3                     | 1.1  | 6              | 1.9  | 3                | 1.8  |

| Which one have you used the most? (Tick one) | Before July | %    | July | %    | August | %    |
|----------------------------------------------|-------------|------|------|------|--------|------|
| News channels                                | 149         | 53.8 | 130  | 40.5 | 73     | 44.0 |
| Public Health and government website         | 28          | 10.1 | 44   | 13.7 | 24     | 14.5 |
| Diabetes UK website                          | 30          | 10.8 | 56   | 17.5 | 28     | 16.9 |
| NHS website                                  | 20          | 8.2  | 18   | 5.6  | 13     | 7.8  |
| Other website                                | 4           | 1.4  | 4    | 1.3  | 2      | 1.2  |
| Social media                                 | 11          | 4.0  | 15   | 4.7  | 4      | 2.4  |
| Facebook                                     | 5           | 1.8  | 7    | 2.2  | 1      | 0.6  |
| GP, diabetes nurse, healthcare professional  | 12          | 4.3  | 13   | 4.4  | 7      | 4.2  |
| Family                                       | 8           | 2.9  | 10   | 3.1  | 4      | 2.4  |
| Friends                                      | 1           | 0.4  | 1    | 0.3  | 1      | 0.6  |
| Employer                                     | 5           | 1.8  | 18   | 5.6  | 8      | 4.8  |
| Diabetes support group                       | 1           | 0.4  | 2    | 0.6  | 0      | 0.0  |
| Other                                        | 2           | 0.7  | 2    | 0.6  | 1      | 0.6  |

## Supplementary File 3: support needs of people living with diabetes during COVID-19

|                |   |     |   |     |   |     |
|----------------|---|-----|---|-----|---|-----|
| Not applicable | 1 | 0.4 | 0 | 0.0 | 0 | 0.0 |
|----------------|---|-----|---|-----|---|-----|

| Which of these resources have you been using for guidance on general diabetes self-management since the start of the pandemic? (Tick all that apply) | Before July (n = 252) | %    | July (n = 304) | %    | August (n = 157) | %    |
|------------------------------------------------------------------------------------------------------------------------------------------------------|-----------------------|------|----------------|------|------------------|------|
| News channels                                                                                                                                        | 44                    | 17.5 | 31             | 10.2 | 26               | 16.6 |
| Public Health and government website                                                                                                                 | 25                    | 9.9  | 33             | 10.9 | 18               | 11.5 |
| Diabetes UK website                                                                                                                                  | 112                   | 44.4 | 157            | 51.6 | 78               | 49.7 |
| NHS website                                                                                                                                          | 60                    | 23.8 | 62             | 20.4 | 31               | 19.8 |
| Other website                                                                                                                                        | 7                     | 2.8  | 14             | 4.6  | 7                | 4.5  |
| Twitter                                                                                                                                              | 9                     | 3.6  | 21             | 6.9  | 7                | 4.5  |
| Facebook                                                                                                                                             | 6                     | 2.4  | 38             | 12.5 | 19               | 12.1 |
| GP, diabetes nurse, healthcare professional                                                                                                          | 81                    | 32.1 | 90             | 29.6 | 36               | 22.9 |
| Family                                                                                                                                               | 23                    | 9.1  | 27             | 8.9  | 7                | 4.5  |
| Friends                                                                                                                                              | 10                    | 4.0  | 13             | 4.3  | 3                | 1.9  |
| Employer                                                                                                                                             | 4                     | 1.6  | 3              | 1.0  | 2                | 1.2  |
| Diabetes support group                                                                                                                               | 11                    | 4.4  | 27             | 8.9  | 10               | 6.4  |
| Other                                                                                                                                                | 8                     | 3.2  | 4              | 1.3  | 3                | 1.9  |

| Which of these resources do you use to obtain emotional support? (Tick all that apply) | Before July (n = 247) | %    | July (n = 291) | %    | August (n = 149) | %    |
|----------------------------------------------------------------------------------------|-----------------------|------|----------------|------|------------------|------|
| Diabetes UK website – online forum                                                     | 19                    | 7.7  | 21             | 7.2  | 15               | 10.1 |
| Diabetes UK helpline                                                                   | 6                     | 2.4  | 7              | 2.4  | 2                | 1.3  |
| Social media communities                                                               | 22                    | 8.9  | 32             | 11.0 | 17               | 11.4 |
| GP, diabetes nurse, healthcare professional                                            | 32                    | 13.0 | 31             | 10.7 | 23               | 15.4 |
| Family                                                                                 | 175                   | 70.9 | 194            | 66.7 | 104              | 69.8 |
| Friends                                                                                | 126                   | 51.0 | 153            | 52.6 | 71               | 47.7 |
| Employer                                                                               | 16                    | 6.5  | 20             | 6.9  | 3                | 2.0  |
| Diabetes support group                                                                 | 11                    | 4.5  | 16             | 5.5  | 5                | 3.4  |
| Other                                                                                  | 6                     | 2.4  | 2              | 0.7  | 2                | 1.3  |

| Which means do you use to obtain advice/guidance/support from outside your household? (tick all that apply) | Before July (n = 219) | July (n = 273) | August (n = 146) |
|-------------------------------------------------------------------------------------------------------------|-----------------------|----------------|------------------|
| Telephone                                                                                                   | 53 (24.2%)            | 47 (17.2%)     | 24 (16.4%)       |
| Computer                                                                                                    | 171 (78.1%)           | 194 (71.1%)    | 102 (69.9%)      |
| Mobile phone                                                                                                | 43 (65.3%)            | 189 (69.2%)    | 97 (66.4%)       |
| Someone in the house                                                                                        | 19 (8.7%)             | 16 (5.9%)      | 6 (4.1%)         |
| Other                                                                                                       | 0 (0.0%)              | 3 (1.1%)       | 0 (0.0%)         |

Questions specific to those respondents living alone

| If you are living alone, are you receiving support from people outside your household? | Before July | July       | August     |
|----------------------------------------------------------------------------------------|-------------|------------|------------|
| No                                                                                     | 36 (51.4%)  | 34 (51.5%) | 13 (46.4%) |

## Supplementary File 3: support needs of people living with diabetes during COVID-19

|     |             |             |             |
|-----|-------------|-------------|-------------|
| Yes | 34 (48.6%)  | 32 (48.5%)  | 15 (53.6%)  |
|     | 70 (100.0%) | 66 (100.0%) | 28 (100.0%) |

This table is restricted to participants who reported living alone for the question on living circumstances.

**Opinions on information, advice, and support received**

| In general, how difficult or easy has it been for you to obtain INFORMATION/ADVICE applicable to you on the following? | Before July | July       | August     |
|------------------------------------------------------------------------------------------------------------------------|-------------|------------|------------|
| <b>Glucose control</b>                                                                                                 |             |            |            |
| Very difficult                                                                                                         | 6 (2.9%)    | 21 (7.8%)  | 7 (5.0%)   |
| Difficult                                                                                                              | 22 (10.6%)  | 49 (18.2%) | 18 (12.9%) |
| Moderate                                                                                                               | 67 (32.4%)  | 70 (26.0%) | 31 (22.1%) |
| Easy                                                                                                                   | 57 (27.5%)  | 73 (27.1%) | 34 (24.3%) |
| Very easy                                                                                                              | 55 (26.6%)  | 56 (20.8%) | 50 (35.7%) |
| <b>Diet</b>                                                                                                            |             |            |            |
| Very difficult                                                                                                         | 10 (4.7%)   | 20 (7.2%)  | 9 (6.6%)   |
| Difficult                                                                                                              | 18 (8.4%)   | 48 (17.4%) | 14 (10.3%) |
| Moderate                                                                                                               | 67 (31.3%)  | 79 (28.6%) | 28 (20.6%) |
| Easy                                                                                                                   | 55 (25.7%)  | 76 (27.5%) | 42 (30.9%) |
| Very easy                                                                                                              | 64 (29.9%)  | 53 (19.2%) | 43 (31.6%) |
| <b>Physical activity</b>                                                                                               |             |            |            |
| Very difficult                                                                                                         | 14 (6.3%)   | 24 (8.5%)  | 9 (6.5%)   |
| Difficult                                                                                                              | 26 (11.7%)  | 45 (15.9%) | 14 (10.1%) |
| Moderate                                                                                                               | 59 (26.6%)  | 75 (26.5%) | 29 (21.0%) |
| Easy                                                                                                                   | 66 (29.7%)  | 85 (30.0%) | 48 (34.8%) |
| Very easy                                                                                                              | 57 (25.7%)  | 54 (19.1%) | 38 (27.5%) |
| <b>Medication</b>                                                                                                      |             |            |            |
| Very difficult                                                                                                         | 3 (1.3%)    | 26 (9.0%)  | 5 (3.7%)   |
| Difficult                                                                                                              | 27 (11.8%)  | 48 (16.6%) | 19 (14.0%) |
| Moderate                                                                                                               | 60 (26.3%)  | 77 (26.6%) | 28 (20.6%) |
| Easy                                                                                                                   | 64 (28.1%)  | 87 (30.1%) | 42 (30.9%) |
| Very easy                                                                                                              | 74 (32.5%)  | 51 (17.6%) | 42 (30.9%) |
| <b>Emotional wellbeing</b>                                                                                             |             |            |            |
| Very difficult                                                                                                         | 9 (4.4%)    | 57 (19.8%) | 18 (12.9%) |
| Difficult                                                                                                              | 40 (19.7%)  | 65 (22.6%) | 27 (19.3%) |
| Moderate                                                                                                               | 68 (33.5%)  | 83 (28.8%) | 46 (32.9%) |
| Easy                                                                                                                   | 43 (21.2%)  | 57 (19.8%) | 22 (15.7%) |
| Very easy                                                                                                              | 43 (21.2%)  | 26 (9.0%)  | 27 (19.3%) |
| <b>Diabetes management (if showing symptoms)</b>                                                                       |             |            |            |
| Very difficult                                                                                                         | 18 (13.4%)  | 31 (19.9%) | 10 (11.8%) |
| Difficult                                                                                                              | 28 (20.9%)  | 26 (16.7%) | 16 (18.8%) |
| Moderate                                                                                                               | 36 (26.9%)  | 45 (28.8%) | 22 (25.9%) |
| Easy                                                                                                                   | 30 (22.4%)  | 32 (20.5%) | 17 (20.0%) |
| Very easy                                                                                                              | 22 (16.4%)  | 22 (14.1%) | 20 (23.5%) |
| <b>Physical/social/physical distancing</b>                                                                             |             |            |            |
| Very difficult                                                                                                         | 26 (10.2%)  | 30 (9.8%)  | 6 (3.9%)   |
| Difficult                                                                                                              | 34 (13.3%)  | 59 (19.2%) | 11 (7.1%)  |
| Moderate                                                                                                               | 55 (21.6%)  | 70 (22.8%) | 44 (28.6%) |
| Easy                                                                                                                   | 66 (25.9%)  | 81 (26.4%) | 44 (28.6%) |



## Supplementary File 3: support needs of people living with diabetes during COVID-19

|           |            |            |            |
|-----------|------------|------------|------------|
| Very easy | 74 (29.0%) | 67 (21.8%) | 49 (31.8%) |
|-----------|------------|------------|------------|

| In general, how difficult or easy has it been for you to obtain SUPPORT applicable to you on the following?     | Before July        | July        | August        |
|-----------------------------------------------------------------------------------------------------------------|--------------------|-------------|---------------|
| <b>Glucose control</b>                                                                                          |                    |             |               |
| Very difficult                                                                                                  | 15 (9.3%)          | 35 (13.9%)  | 13 (11.3%)    |
| Difficult                                                                                                       | 29 (18.0%)         | 61 (24.3%)  | 21 (18.3%)    |
| Moderate                                                                                                        | 48 (29.8%)         | 61 (24.3%)  | 32 (27.8%)    |
| Easy                                                                                                            | 36 (22.4%)         | 55 (21.9%)  | 22 (19.1%)    |
| Very easy                                                                                                       | 33 (20.5%)         | 39 (15.5%)  | 27 (23.5%)    |
| <b>Diet</b>                                                                                                     |                    |             |               |
| Very difficult                                                                                                  | 13 (8.0%)          | 31 (12.4%)  | 13 (11.8%)    |
| Difficult                                                                                                       | 28 (17.2%)         | 64 (25.6%)  | 17 (15.5%)    |
| Moderate                                                                                                        | 46 (28.2%)         | 66 (26.4%)  | 32 (29.1%)    |
| Easy                                                                                                            | 45 (27.6%)         | 55 (22.0%)  | 22 (20.0%)    |
| Very easy                                                                                                       | 31 (19.0%)         | 34 (13.6%)  | 26 (23.6%)    |
| <b>Physical activity</b>                                                                                        |                    |             |               |
| Very difficult                                                                                                  | 17 (9.9%)          | 31 (12.2%)  | 12 (10.6%)    |
| Difficult                                                                                                       | 30 (17.4%)         | 61 (24.0%)  | 18 (15.9%)    |
| Moderate                                                                                                        | 44 (25.6%)         | 66 (26.0%)  | 35 (31.0%)    |
| Easy                                                                                                            | 42 (24.4%)         | 62 (24.4%)  | 23 (20.4%)    |
| Very easy                                                                                                       | 39 (22.7%)         | 34 (13.4%)  | 25 (22.1%)    |
| <b>Medication</b>                                                                                               |                    |             |               |
| Very difficult                                                                                                  | 9 (4.9%)           | 35 (13.3%)  | 11 (9.3%)     |
| Difficult                                                                                                       | 26 (14.2%)         | 54 (20.5%)  | 22 (18.6%)    |
| Moderate                                                                                                        | 56 (30.6%)         | 60 (22.8%)  | 31 (26.3%)    |
| Easy                                                                                                            | 41 (22.4%)         | 73 (27.8%)  | 24 (20.3%)    |
| Very easy                                                                                                       | 51 (27.9%)         | 41 (15.6%)  | 30 (25.4%)    |
| <b>Emotional wellbeing</b>                                                                                      |                    |             |               |
| Very difficult                                                                                                  | 16 (9.5%)          | 54 (20.0%)  | 19 (16.2%)    |
| Difficult                                                                                                       | 35 (20.8%)         | 75 (27.8%)  | 20 (17.1%)    |
| Moderate                                                                                                        | 48 (28.6%)         | 73 (27.0%)  | 45 (38.5%)    |
| Easy                                                                                                            | 39 (23.2%)         | 43 (15.9%)  | 15 (12.8%)    |
| Very easy                                                                                                       | 30 (17.9%)         | 25 (9.3%)   | 18 (15.4%)    |
| <b>Diabetes management (if showing symptoms)</b>                                                                |                    |             |               |
| Very difficult                                                                                                  | 18 (17.3%)         | 30 (22.6%)  | 9 (13.2%)     |
| Difficult                                                                                                       | 20 (19.2%)         | 27 (20.3%)  | 11 (16.2%)    |
| Moderate                                                                                                        | 27 (26.0%)         | 34 (25.6%)  | 23 (33.8%)    |
| Easy                                                                                                            | 22 (21.2%)         | 25 (18.8%)  | 8 (11.8%)     |
| Very easy                                                                                                       | 17 (16.3%)         | 17 (12.8%)  | 17 (25.0%)    |
| <b>Physical/social distancing</b>                                                                               |                    |             |               |
| Very difficult                                                                                                  | 23 (11.6%)         | 34 (12.3%)  | 10 (7.8%)     |
| Difficult                                                                                                       | 32 (16.2%)         | 57 (20.7%)  | 12 (9.3%)     |
| Moderate                                                                                                        | 54 (27.3%)         | 70 (25.4%)  | 41 (31.8%)    |
| Easy                                                                                                            | 42 (21.2%)         | 68 (24.6%)  | 33 (25.6%)    |
| Very easy                                                                                                       | 47 (23.7%)         | 47 (17.0%)  | 33 (25.6%)    |
|                                                                                                                 |                    |             |               |
| <b>How would you rate the QUALITY of the information/advice/support from the following sources or channels?</b> | <b>Before July</b> | <b>July</b> | <b>August</b> |

## Supplementary File 3: support needs of people living with diabetes during COVID-19

|                        |            |             |            |
|------------------------|------------|-------------|------------|
| <b>Government</b>      |            |             |            |
| Very poor              | 38 (14.7%) | 47 (15.0%)  | 20 (13.1%) |
| Poor                   | 64 (24.7%) | 83 (26.4%)  | 31 (20.3%) |
| Average                | 69 (26.6%) | 94 (29.9%)  | 46 (30.1%) |
| Good                   | 59 (22.8%) | 62 (19.7%)  | 37 (24.2%) |
| Very good              | 29 (11.2%) | 28 (8.9%)   | 19 (12.4%) |
| <b>Diabetes UK</b>     |            |             |            |
| Very poor              | 7 (3.3%)   | 6 (2.1%)    | 1 (0.7%)   |
| Poor                   | 21 (9.9%)  | 7 (2.4%)    | 6 (4.0%)   |
| Average                | 41 (19.2%) | 83 (29.0%)  | 28 (18.5%) |
| Good                   | 97 (45.5%) | 124 (43.4%) | 72 (47.7%) |
| Very good              | 47 (22.1%) | 66 (23.1%)  | 44 (29.1%) |
| <b>Social media</b>    |            |             |            |
| Very poor              | 19 (10.2%) | 25 (8.6%)   | 12 (8.2%)  |
| Poor                   | 47 (25.3%) | 74 (25.5%)  | 29 (19.9%) |
| Average                | 70 (37.6%) | 104 (35.9%) | 47 (32.2%) |
| Good                   | 37 (19.9%) | 67 (23.1%)  | 39 (26.7%) |
| Very good              | 13 (7.0%)  | 20 (6.9%)   | 19 (13.0%) |
| <b>News channels</b>   |            |             |            |
| Very poor              | 18 (7.0%)  | 33 (10.9%)  | 10 (6.5%)  |
| Poor                   | 47 (18.2%) | 71 (23.4%)  | 33 (21.6%) |
| Average                | 80 (31.0%) | 102 (33.6%) | 52 (34.0%) |
| Good                   | 90 (34.9%) | 83 (27.3%)  | 41 (26.8%) |
| Very good              | 23 (8.9%)  | 15 (4.9%)   | 17 (11.1%) |
| <b>Friends</b>         |            |             |            |
| Very poor              | 7 (3.4%)   | 17 (6.5%)   | 5 (3.8%)   |
| Poor                   | 25 (12.3%) | 34 (13.0%)  | 13 (9.8%)  |
| Average                | 75 (36.9%) | 113 (43.3%) | 41 (31.1%) |
| Good                   | 69 (34.0%) | 77 (29.5%)  | 53 (40.2%) |
| Very good              | 27 (13.3%) | 20 (7.7%)   | 20 (15.2%) |
| <b>Family</b>          |            |             |            |
| Very poor              | 6 (2.7%)   | 14 (5.0%)   | 3 (2.2%)   |
| Poor                   | 22 (10.0%) | 29 (10.4%)  | 12 (8.8%)  |
| Average                | 62 (28.1%) | 103 (36.9%) | 41 (29.9%) |
| Good                   | 78 (35.3%) | 100 (35.8%) | 51 (37.2%) |
| Very good              | 53 (24.0%) | 33 (11.8%)  | 30 (21.9%) |
| <b>Employer</b>        |            |             |            |
| Very poor              | 19 (12.8%) | 47 (22.7%)  | 14 (14.9%) |
| Poor                   | 25 (16.8%) | 33 (15.9%)  | 7 (7.4%)   |
| Average                | 33 (22.1%) | 51 (24.6%)  | 29 (30.9%) |
| Good                   | 42 (28.2%) | 50 (24.2%)  | 29 (30.9%) |
| Very good              | 30 (20.1%) | 26 (12.6%)  | 15 (16.0%) |
| <b>Healthcare team</b> |            |             |            |
| Very poor              | 15 (7.6%)  | 65 (24.3%)  | 28 (21.1%) |
| Poor                   | 45 (22.7%) | 47 (17.5%)  | 23 (17.3%) |
| Average                | 38 (19.2%) | 55 (20.5%)  | 23 (17.3%) |
| Good                   | 56 (28.3%) | 52 (19.4%)  | 32 (24.1%) |
| Very good              | 44 (22.2%) | 49 (18.3%)  | 27 (20.3%) |

**Personal support networks**

## Supplementary File 3: support needs of people living with diabetes during COVID-19

| For the next questions, please consider your current network of family, friends, contacts.    | Before July | July        | August     |
|-----------------------------------------------------------------------------------------------|-------------|-------------|------------|
| <b>How would you rate their understanding of your CURRENT diabetes self-management needs?</b> |             |             |            |
| Very poor                                                                                     | 10 (3.6%)   | 18 (5.6%)   | 6 (3.6%)   |
| Poor                                                                                          | 31 (11.4%)  | 48 (15.1%)  | 19 (11.5%) |
| Average                                                                                       | 80 (29.3%)  | 107 (33.5%) | 57 (34.3%) |
| Good                                                                                          | 85 (31.1%)  | 96 (30.1%)  | 44 (26.5%) |
| Very good                                                                                     | 67 (24.5%)  | 50 (15.7%)  | 40 (24.1%) |
| <b>How would you rate their support in your diabetes self-management during the pandemic?</b> |             |             |            |
| Very poor                                                                                     | 12 (4.7%)   | 21 (6.7%)   | 4 (2.4%)   |
| Poor                                                                                          | 19 (7.5%)   | 37 (11.8%)  | 20 (12.2%) |
| Average                                                                                       | 54 (21.2%)  | 85 (27.0%)  | 42 (25.6%) |
| Good                                                                                          | 88 (34.5%)  | 105 (33.3%) | 47 (28.7%) |
| Very good                                                                                     | 82 (32.2%)  | 67 (21.3%)  | 51 (31.1%) |

| How has the support you are receiving changed since before the pandemic? (0 = stayed the same) | Before July  | July         | August       |
|------------------------------------------------------------------------------------------------|--------------|--------------|--------------|
| Decreased                                                                                      | 36 (12.9%)   | 76 (23.7%)   | 32 (19.4%)   |
| Same                                                                                           | 157 (56.5%)  | 158 (49.2%)  | 90 (54.6%)   |
| Increased                                                                                      | 85 (30.6%)   | 87 (27.1%)   | 43 (26.1%)   |
|                                                                                                | 278 (100.0%) | 321 (100.0%) | 165 (100.0%) |

Note: score given on a Likert scale ranging from -5 (Decreased) to 5 (Increased).

| In what ways do they CURRENTLY support your diabetes self-management? (Tick all that apply) | Before July (n = 217) | %    | July (n = 256) | %    | August (n = 130) | %    |
|---------------------------------------------------------------------------------------------|-----------------------|------|----------------|------|------------------|------|
| Food shopping/preparation                                                                   | 122                   | 56.2 | 132            | 51.6 | 51               | 39.2 |
| Picking up medication                                                                       | 113                   | 52.1 | 124            | 48.4 | 55               | 42.3 |
| Essential travel                                                                            | 30                    | 13.8 | 35             | 13.7 | 19               | 14.6 |
| Monitoring blood glucose                                                                    | 27                    | 12.4 | 36             | 14.1 | 19               | 14.6 |
| Emotional support                                                                           | 138                   | 63.6 | 151            | 59.0 | 85               | 65.4 |
| Access to online resources                                                                  | 25                    | 11.5 | 22             | 8.6  | 18               | 13.9 |
| Prompting self-management behaviours                                                        | 56                    | 25.8 | 83             | 32.4 | 35               | 26.9 |
| Other                                                                                       | 11                    | 5.1  | 14             | 5.5  | 1                | 0.8  |
